# Supplementary material for: Association between asthma and dry eye disease: a meta-analysis based on observational studies
Source: PubMed Central journal article supplement — BMJ Open. 2021 Dec 10;11(12):e045275. doi: 10.1136/bmjopen-2020-045275 (PMC8666867; doi:10.1136/bmjopen-2020-045275), 2021-12-10
Supplement: bmjopen-2020-045275.draft_revisions.pdf [file bmjopen-2020-045275.draft_revisions.pdf]

# BMJ Open

BMJ Open is committed to open peer review. As part of this commitment we make the peer review history of every article we publish publicly available.

When an article is published we post the peer reviewers' comments and the authors' responses online. We also post the versions of the paper that were used during peer review. These are the versions that the peer review comments apply to.

The versions of the paper that follow are the versions that were submitted during the peer review process. They are not the versions of record or the final published versions. They should not be cited or distributed as the published version of this manuscript.

BMJ Open is an open access journal and the full, final, typeset and author-corrected version of record of the manuscript is available on our site with no access controls, subscription charges or pay-per-view fees (<http://bmjopen.bmj.com>).

If you have any questions on BMJ Open's open peer review process please email [info.bmjopen@bmj.com](mailto:info.bmjopen@bmj.com)

# BMJ Open

## Association between asthma with dry eye disease: A Meta-Analysis based on observational studies.

|                               |                                                                                                                                                                                                                                                                                                                                                                                                                                                                                                                                                                                                                                                                                                                                                                                                         |
|-------------------------------|---------------------------------------------------------------------------------------------------------------------------------------------------------------------------------------------------------------------------------------------------------------------------------------------------------------------------------------------------------------------------------------------------------------------------------------------------------------------------------------------------------------------------------------------------------------------------------------------------------------------------------------------------------------------------------------------------------------------------------------------------------------------------------------------------------|
| Journal:                      | <i>BMJ Open</i>                                                                                                                                                                                                                                                                                                                                                                                                                                                                                                                                                                                                                                                                                                                                                                                         |
| Manuscript ID                 | bmjopen-2020-045275                                                                                                                                                                                                                                                                                                                                                                                                                                                                                                                                                                                                                                                                                                                                                                                     |
| Article Type:                 | Original research                                                                                                                                                                                                                                                                                                                                                                                                                                                                                                                                                                                                                                                                                                                                                                                       |
| Date Submitted by the Author: | 11-Oct-2020                                                                                                                                                                                                                                                                                                                                                                                                                                                                                                                                                                                                                                                                                                                                                                                             |
| Complete List of Authors:     | <p>huang, qun; Chengdu University of Traditional Chinese Medicine Affiliated Hospital, Ophthalmology; Chengdu University of TCM</p> <p>zheng, yanlin; Chengdu University of Traditional Chinese Medicine Affiliated Hospital</p> <p>zhang, chuantao; Chengdu University of Traditional Chinese Medicine Affiliated Hospital</p> <p>wang, wanjie; Chengdu University of Traditional Chinese Medicine Affiliated Hospital</p> <p>liao, tingting; Chengdu University of Traditional Chinese Medicine Affiliated Hospital</p> <p>xiao, xili; Chengdu University of Traditional Chinese Medicine Affiliated Hospital</p> <p>wang, jing; Chengdu University of Traditional Chinese Medicine Affiliated Hospital</p> <p>wang, juan; Chengdu University of Traditional Chinese Medicine Affiliated Hospital</p> |
| Keywords:                     | Medical ophthalmology < OPHTHALMOLOGY, Asthma < THORACIC MEDICINE, Paediatric ophthalmology < OPHTHALMOLOGY                                                                                                                                                                                                                                                                                                                                                                                                                                                                                                                                                                                                                                                                                             |
|                               |                                                                                                                                                                                                                                                                                                                                                                                                                                                                                                                                                                                                                                                                                                                                                                                                         |

SCHOLARONE™  
Manuscripts

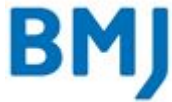

I, the Submitting Author has the right to grant and does grant on behalf of all authors of the Work (as defined in the below author licence), an exclusive licence and/or a non-exclusive licence for contributions from authors who are: i) UK Crown employees; ii) where BMJ has agreed a CC-BY licence shall apply, and/or iii) in accordance with the terms applicable for US Federal Government officers or employees acting as part of their official duties; on a worldwide, perpetual, irrevocable, royalty-free basis to BMJ Publishing Group Ltd ("BMJ") its licensees and where the relevant Journal is co-owned by BMJ to the co-owners of the Journal, to publish the Work in this journal and any other BMJ products and to exploit all rights, as set out in our [licence](#).

The Submitting Author accepts and understands that any supply made under these terms is made by BMJ to the Submitting Author unless you are acting as an employee on behalf of your employer or a postgraduate student of an affiliated institution which is paying any applicable article publishing charge ("APC") for Open Access articles. Where the Submitting Author wishes to make the Work available on an Open Access basis (and intends to pay the relevant APC), the terms of reuse of such Open Access shall be governed by a Creative Commons licence – details of these licences and which [Creative Commons](#) licence will apply to this Work are set out in our licence referred to above.

Other than as permitted in any relevant BMJ Author's Self Archiving Policies, I confirm this Work has not been accepted for publication elsewhere, is not being considered for publication elsewhere and does not duplicate material already published. I confirm all authors consent to publication of this Work and authorise the granting of this licence.

# Association between asthma with dry eye disease: A Meta-Analysis based on observational studies.

## Running title: asthma and DED

Huang Qun<sup>1\*</sup>, M.M., Zheng Yanlin<sup>2†</sup>, M.M., Zhang Chuantao<sup>3</sup>, M.D., Wang Wanjie<sup>1</sup>, M.M., Liao Tingting<sup>4</sup>, Xiao Xili<sup>1</sup>, M.M., Wang Jing<sup>1</sup>, M.M., Wang Juan<sup>1</sup>, M.B

1 Department of Ophthalmology, Hospital of Chengdu University of Traditional Chinese Medicine, Chengdu, China.

2 Clinical Medical College, Chengdu University of Traditional Chinese Medicine, Chengdu, China.

3 Department of Respiratory Medicine, Hospital of Chengdu University of Traditional Chinese Medicine, Chengdu, China.

4. Department of endocrinology, Hospital of Chengdu University of Traditional Chinese Medicine, Chengdu, China.

\* first author, E-mail: skirth@163.com

† Corresponding author, E-mail: zyl3327@163.com

**Abbreviations:** DED, dry eye disease; PRISMA, Preferred Reporting Items for Systematic Review and Meta-Analyses; MeSH, Medical Subject Headings; OR, odds ratio; NOS, Newcastle-Ottawa Scale;

## Abstract

---

### Background

Studies have shown that dry eye disease (DED) is related to asthma, but these views are still controversial.

### Objective

The purpose of this study was to systematically review the relationship between DED and asthma based on the published literature of population-based studies.

## Methods

Observational studies addressed the association between asthma and DED were searched on three electronic databases (PubMed, EMBASE, and ISI Web of Science) from their inception up to October 1, 2019. Search terms included a combination of Medical Subject Headings (MeSHs) and free words related to “asthma” and “dry eye diseases”. Two reviewers independently conducted the literature search, data extraction and quality assessment, and were blinded to the other reviewer. The associations were indicated as odds ratio (OR) with 95% confidence interval (95% CI) and combined using RevMan 5.3 software. Subgroup analysis according to ethnicity was performed to test the influence of ethnicity on the association.

## Results

Six independent studies were included in this review, and have an average of 7 stars by Newcastle-Ottawa Scale (NOS). Our current findings suggested that the prevalence of DED was higher in the asthma group than that in control ( $Z = 7.42$ ,  $P < 0.00001$ ; OR 1.29, 95%CI 1.20, 1.38). In the subgroup analysis by ethnicity, Australian, Caucasian and Asian with asthma showed the increased risk of DED.

## Conclusion

The results of our meta-analysis quantified a clear association between asthma and DED in the overall population. Patients with asthma had an increased chance of developing DED, and this difference in correlation existed among different countries. However, this significant association may not reflect a causal effect due to the cross-sectional design of included studies.

## Strengths and limitations of this study

---

1. To our knowledge, this is the first meta-analytical report to evaluate the association of asthma and DED.
2. Our analysis included an in-depth and extensive literature search that included six studies, presented data of sufficient quality, and calculated outcome measures that were independent of the risk of research bias.
3. The results of our meta-analysis quantified a clear association between asthma and DED.
4. However, our research has some limitations in interpreting the results. As a general defect in the meta-analysis of observational studies, we cannot rule out the possibility that certain residual factors may link asthma and DED, such as environmental factors and the use of asthma medications.
5. Due to geographic and cultural differences, the lack of universal diagnostic criteria can affect the association between asthma and the incidence of DED.

## Keywords

---

Dry eye disease; asthma; meta-analysis.

## 1. Introduction

---

DED has been the focus of attention in recent years, as it is one of the main reasons for seeking eye care in an eye clinics [1]. According to surveys, the prevalence of DED is estimated to be between 5% and 50% [2-8], which frequency increases with age [9]. The economic burden and impact of DED is considerable, in terms of vision, quality of life, work productivity, psychological and physical impact of pain, and so forth. Therefore, as a result of the significant decline in work efficiency, indirect costs account for the largest proportion of total costs [8, 10, 11].

Dry eye disease (DED) is considered to be a multifactorial disease of the ocular surface characterized by a loss of homeostasis of the tear film, and accompanied by ocular symptoms, in which tear film instability and hyperosmolarity, ocular surface inflammation and damage, and neurosensory abnormalities play etiological roles [12]. Clear factors currently known to be associated with the onset of DED include age, gender, and hormones, but in recent years it has also been found that the association of DED with asthma, allergic rhinitis, and atopic dermatitis [13].

Asthma is one of the most common chronic immunological diseases in humans, but is largely undiagnosed and undertreated in China. Approximately 300 million people worldwide are affected by asthma and about 7.5% of adults in the United States are affected [14]. Its mortality rate is estimated to 0.19 deaths per 100 000 people [15, 16]. The etiology of asthma is multifactorial, including atopic sensitization [17], viral respiratory infections [18], environmental exposures [19], obesity [20] and smoke [21]. Asthma is considered to be the result of complex genetic-environmental interaction, with heterogeneity in clinical manifestation and the type and intensity of airway inflammation and remodeling [22].

Increasing evidence suggests that DED is associated with a high risk of ocular allergy [23, 24]. Ocular allergy, particularly the severe forms of keratoconjunctivitis, has an impact on different key mechanisms of the DED, including tear film instability, ocular surface inflammation and damage, and neurosensory abnormalities [25]. And patients with asthma also often have allergic comorbidities such as allergic rhinitis, allergic conjunctivitis, atopic dermatitis, food allergy, drug allergy [26, 27]. Recently, several studies have highlighted the possible relationship between dry eye disease and asthma [28, 29]. However, a possible relationship between asthma and DED is still under investigation and the well-established information is very limited. To the best of our knowledge, no published meta-analysis has been performed to assess the relationship between asthma and DED. Thus, we performed the current meta-analysis to determine whether there is a link between asthma and DED and to use a meta-analytic approach to quantify such associations.

## 2. Methods

---

This systematic review and meta-analysis conformed to the Preferred Reporting Items for Systematic Review and Meta-Analyses (PRISMA) guidelines [30]. Ethical approval, informed consent, Patient and public involvement statement were not necessary, because all the data used for analyses were extracted from available publications. The Meta-Analysis has been registered in the Open Science Framework(OSF) (registration number: DOI 10.17605/OSF.IO/UHN38).

### 2.1. Literature search strategy

Referring to the search strategy suggested by Cochrane, two researchers independently and systematically searched three electronic databases, including PubMed, EMBASE, and ISI Web of Science, from the database inception date until October 1, 2019 without language restrictions. A combination of Medical Subject Terms (MeSHs) and free terms was used to retrieve possibly eligible publications in each electronic database, and the English search strategy was as follows: (asthma or wheeze or “Asthma”[MeSH]) and (dry eye or dry eye disease or Keratoconjunctivitis Sicca or Xerophthalmia or Sjogren's Syndrome or “Dry eye syndrome”[MeSH]). For Chinese academic databanks, we used “gan yan” and “xiao chuan” to identify relevant Chinese articles. We also manually screened the reference lists of original and review articles for additionally eligible studies.

### 2.2. Inclusion Criteria

The inclusion criteria were as follow: (i) the diagnosis of asthma and DED in the study group was based on well-established criteria or according to a clinical diagnosis made by clinical physicians; (ii) control subjects should be free of any history of asthma or DED, no specific restriction on gender and age was imposed; (iii) types of study were observational studies including cross-sectional studies, cohort studies, case-control studies or epidemiological studies; (iv) the main outcome was the association between DED and asthma, as indicated by OR and the associated 95%CI, which should be either provided directly in the original article or could be calculated based on the original data. If studies with overlapping participants were encountered, the reports with the largest sample and the most recent reports were included in the present meta-analysis. If no data is available in the original article, the corresponding author of relevant study would be contacted via email. If the corresponding author did not response after we sent three e-mails, this article would not be used for quantitative synthesis. Abstracts, editorial letters, reviews, case reports, book chapters and organizational guidelines were excluded from the present analysis.

### Data extraction

According to the predetermined inclusion criteria, two reviewers (XXL and WJ) independently conducted the literature search, data extraction and quality assessment, and were blinded to the findings of the other reviewer. After a rigorous screening, the

1  
2  
3 following data regarding the characteristics of the studies were extracted using a  
4 standardized collection form: first author, year of publication, country where the study  
5 was conducted, sample size, demographic characteristics of participants in different  
6 groups, strategies for confirmation of DED and asthma, adjustment of confounding  
7 factors for effect assessment. Disagreements occurred during the study selection was  
8 resolved through discussion with a third reviewer (ZYL) until a mutual consensus was  
9 reached.  
10  
11  
12

### 13 14 Quality assessment

15  
16 The Newcastle-Ottawa Scale (NOS) was used to assess the risk of bias in case-control  
17 and cohort studies [31]. The methodological quality of the cross-sectional studies was  
18 evaluated following the standards of the Agency for Healthcare Research and Quality  
19 (AHRQ) [32]. Two reviewers (WWJ and WJ) independently conducted quality  
20 assessment of included studies and compared the results afterwards. The third  
21 reviewer (ZYL) was consulted for help in case of discrepancies regarding the quality  
22 assessment.  
23  
24  
25

### 26 27 Data Synthesis and Analysis

28  
29 RevMan 5.3 (Copenhagen: The Nordic Cochrane Centre, The Cochrane  
30 Collaboration, 2014) was used for the meta-analysis and subgroup analysis. The  
31 association between asthma and DED was estimated using adjusted OR and  
32 unadjusted OR, the upper and lower limits of the 95%CI were extracted from each  
33 study. The confounding factors considered included age and gender. Before combining  
34 data from the included studies, statistical heterogeneity among studies for each  
35 outcome was estimated using a standard Chi-square test and the Higgins I<sup>2</sup> test (P>0.1  
36 and I<sup>2</sup><50% indicated acceptable heterogeneity [33]). In meta-analyses of multiple  
37 studies for a specific outcome, a random-effect estimate was calculated for pooling  
38 data across studies if statistical heterogeneity existed; however, if a low heterogeneity  
39 was detected in the meta-analysis, a random-effect estimate was also calculated, as  
40 the validity of tests of heterogeneity could be limited with a small number of  
41 component studies. In case of high heterogeneity, subgroup analysis was carried out  
42 by ethnicity, as it was the only confounding factor consistently presented in our  
43 selected studies. Sensitivity analysis was conducted by omitting one study at a time  
44 and evaluating the resulting effect to determine the potential source of heterogeneity.  
45 Begg's rank correlation test and Egger's linear regression test via Stata version 12.0  
46 (Stata Corp LP, USA) were employed to evaluate publication bias. P < 0.05 (1-sided)  
47 was considered statistically significant, except for tests of heterogeneity.  
48  
49  
50  
51  
52  
53  
54  
55  
56  
57  
58  
59  
60



## Results

---

### Literature search results

A total of 231 potential literature citations were searched initially, including 71 records from PubMed, 78 from EMBASE, and 82 from ISI Web of Science (Fig 1). And 27 duplicate articles were excluded. Based on the predetermined selection criteria, 198 studies were excluded at the title and abstract stages, and 6 potentially relevant studies were selected and retrieved for a full-text reading and evaluation of data integrity. Finally, a total of 6 studies [13, 28, 29, 34-36] met all the inclusion criteria for this systematic review and were included.

### Study characteristics

Overall, the sample sizes of the included literature ranged from 1174 to 105794, of which a total of 45215 patients with asthma and 232864 control subjects were included. The included studies were published between 2003 and 2018 and involved different ethnicities, including Arabian, Australian, Asian, and Caucasian. Assessment of asthma and DED were inconsistent between studies, and detailed data on main characteristics of these studies were shown in Table 1.

### Risk of bias assessment

The methodological quality of included studies was considered low to high according to the NOS. Six included studies achieved an average of 7 stars, and two studies [28, 34] gained nine stars (Table 2).

ew only

Table 1. Main characteristics of included studies

| Study           | Country      | Ethnicity  | Sample size                      | Mean age | Definition of asthma                   | Definition of DED                      | Adjustment for confounders                                                            |
|-----------------|--------------|------------|----------------------------------|----------|----------------------------------------|----------------------------------------|---------------------------------------------------------------------------------------|
| Abdulaziz, 2017 | Saudi Arabia | Arabian    | Asthma: 139<br>Control: 1719     | 39.3     | Questionnaire                          | Six-item questionnaire                 | Age, gender and smoking                                                               |
| Chia, 2003      | Australia    | Australian | Asthma: 135<br>Control: 1039     | 60.8     | Medical history of confirmed diagnosis | Interviewer-administered questionnaire | Age and gender                                                                        |
| Huang, 2018     | Taiwan       | Asian      | Asthma: 41229<br>Control: 164916 | 49.56    | ICD-9-CM 493                           | ICD-9-CM 375.15                        | Age and gender                                                                        |
| Kim, 2016       | Korea        | Asian      | Asthma: 556<br>Control: 16494    | 50.88    | Medical history                        | Interviewer-administered questionnaire | Age, gender, residential area, education level, occupation and history of eye surgery |
| Vehof, 2014     | UK           | Caucasian  | Asthma: 608<br>Control: 3216     | 57.1     | Medical history                        | ICD-9-CM 375.15                        | Age and gender                                                                        |
| Wang, 2012      | Taiwan       | Asian      | Asthma: 2548<br>Control: 45480   | 52.4     | Elixhauser comorbidity index           | ICD-9-CM 375.15                        | Age, gender, urbanization levels and monthly incomes                                  |

DED: dry eye disease.

1  
2  
3  
4  
5  
6  
7  
8  
9  
10  
11  
12  
13  
14  
15  
16  
17  
18  
19  
20  
21  
22  
23  
24  
25  
26  
27  
28  
29  
30  
31  
32  
33  
34  
35  
36  
37  
38  
39  
40  
41  
42  
43  
44  
45  
46

Table 2. Quality assessment of included studies according to the Newcastle-Ottawa scale.

| Item/Study                                        | Abdulaziz,<br>2017 | Chia,<br>2003 | Huang,<br>2018 | Kim,<br>2016 | Vehof,<br>2014 | Wang,<br>2012 |
|---------------------------------------------------|--------------------|---------------|----------------|--------------|----------------|---------------|
| Adequate definition of cases                      | *                  | *             | *              | *            | *              | *             |
| Representativeness of cases                       | *                  | -             | *              | *            | -              | *             |
| Selection of control subjects                     | -                  | -             | *              | *            | -              | *             |
| Definition of control subjects                    | *                  | *             | *              | *            | *              | *             |
| Control for important factor or additional factor | -                  | -             | **             | -            | *              | **            |
| Exposure assessment                               | *                  | *             | *              | *            | *              | *             |
| Same method of ascertainment for all subjects     | *                  | *             | *              | *            | *              | *             |
| Non-response rate                                 | *                  | *             | *              | *            | *              | *             |

A study could be awarded a maximum of one star for each item except for the item “Control for important factor or additional factor”.  
 The definition/explanation of each column of the Newcastle-Ottawa Scale is available from  
[http://www.ohri.ca/programs/clinical\\_epidemiology/oxford.asp](http://www.ohri.ca/programs/clinical_epidemiology/oxford.asp).

## Meta-analyses Results

A random effect model was selected to analyze the effect size with modest heterogeneity among the studies ( $I^2 = 23\%$ ,  $P = 0.26$ ). The asthma group had significantly higher prevalence of DED compared to control group (OR 1.29, 95%CI 1.20, 1.38;  $P < 0.00001$ ). In other words, there was a significant association between the presence of asthma and DED (Fig 2). Owing to a lack of data, it was not possible to detect the association between asthma and diverse subtypes of DED.

### Subgroup analysis and sensitivity analysis

Subgroup-analysis was performed according to ethnicity (Fig 3). In the stratified analysis by ethnicity, a statistically significant correlation was detected in Australian (OR 1.60, 95%CI 1.00, 2.56;  $P = 0.05$ ), Caucasian (OR 1.54, 95%CI 1.17, 2.03;  $P = 0.002$ ), Asian (OR 1.29, 95%CI 1.23, 1.35;  $P < 0.00001$ ) countries, but this association was not significant among Arabian population (OR 0.96, 95%CI 0.63, 1.46;  $P = 0.85$ ).

### Sensitivity analysis and publication bias

The funnel plot for the association between asthma and DED was symmetrical in vision (Fig 4), the Begg's test ( $z = 0.38$ ,  $P = 0.727$ ) and Egger's test ( $t = -0.40$ ,  $P = 0.708$ ) also suggested no statistically significant publication bias. Sensitivity analysis confirmed the robustness of our conclusion (detailed data not shown).

## Discussion

---

To the best of our knowledge, this is the first systematic review and meta-analysis to assess the association between asthma and DED, which examines a large dataset of 6 studies with a total of 278079 participants. Our current findings suggested that asthma patients had a higher risk of developing DED than the non-asthma subjects, and this significant correlation could be observed in different ethnicities expect for Arabians. In the subgroup analysis of study location, Australian, Caucasian and Asian patients with asthma showed increased risk of DED.

There have been some population-based studies that have emphasized the possible relationship between DED and asthma. Chia et al. [29] found that after adjusting for age and gender factors, asthma is a systemic factor closely related to DED. Dogru et al. [37] found that the mean measurement of tear film breakup time was significantly lower in asthma than control, and the presence of tear film instability was higher in children with asthma, which may lead to DED in the future. Furthermore, in terms of treatment, Huang et al. [28] found that patients taking asthma-related treatments including leukotriene receptor antagonists, antihistamines, and inhaled corticosteroids were at greater risk for DED. Bielory [38] found that antihistaminic and anti-inflammatory agents used in the treatment of asthma and allergy, may exacerbate

1  
2  
3 dry-eye complaints that commonly complicate symptoms with various forms of tear  
4 film dysfunction or conjunctival hyperreactivity.  
5

6  
7 Asthma is a consequence of complex gene-environment interactions, and is an  
8 inflammatory response triggered by exposure to allergens, infection, or irritants[22,  
9 39]. Innate and adaptive cells, including eosinophils, mast cells, lymphocytes,  
10 neutrophils, and monocytes, are activated to express or derive cytokines and  
11 chemokines and enhance inflammation and airway hyperresponsiveness, leading to  
12 airway remodeling [40]. By contrast, the most widely accepted hypothesis for the  
13 pathogenesis of dry eye disease is immunological mechanism [41] and inflammation  
14 [42, 43]. There is potential for the ocular homeostasis to be altered by innate and  
15 adaptive cells such as neutrophils, lymphocytes, eosinophils, NK cells, macrophages,  
16 and result in inflammatory processes that compromise both the tear film and ocular  
17 surface integrity [44]. Although the exact mechanism of DED and asthma is not  
18 completely clear, the pathogenesis of both diseases is closely related to inflammation,  
19 which may have some shared biological pathways.  
20  
21  
22  
23

24 Asthma and DED are common clinical diseases, and there is still no evidence to  
25 support a causal relationship between asthma and DED, which may have a common  
26 pathophysiological mechanism even if they occur independently. Clinicians need to  
27 diagnose the possibility of both asthma and dry eye syndrome. Asthma patients  
28 should strengthen prevention and treatment of DED, and try to avoid the risk factors  
29 of DED and iatrogenic DED, including wearing contact lens, long-term use of visual  
30 display terminal, refractive or cataract surgery [45, 46].  
31  
32  
33

### 34 Limitations

35  
36 Our analysis included an in-depth and extensive literature search that included six  
37 studies, presented data of sufficient quality, and calculated outcome measures that  
38 were independent of the risk of research bias. However, our research has some  
39 limitations in interpreting the results. As a general defect in the meta-analysis of  
40 observational studies, first, we cannot rule out the possibility that certain residual  
41 factors may link asthma and DED, such as environmental factors and the use of  
42 asthma medications. Second, due to geographic and cultural differences, the lack of  
43 universal diagnostic criteria can affect the association between asthma and the  
44 incidence of DED. Finally, the results of this study do not indicate a causal  
45 relationship between asthma and DED. We recognize that this is a limitation, thus the  
46 results should be interpreted cautiously.  
47  
48  
49  
50

### 51 Conclusions

---

52  
53  
54 The results of our meta-analysis show that asthma patients have a higher risk of  
55 developing DED than the subjects without asthma, and this relationship is significant  
56 in Australians, Caucasians, and Asians. However, this association may not reflect  
57 cause and effect if unidentified confounders account for the results. These data  
58  
59  
60

1  
2  
3 suggest that patients with asthma may be at risk of carrying a comorbid diagnosis of  
4 DED, and should try to avoid risk factors and strengthen the prevention of DED.  
5  
6  
7  
8  
9

## 10 Author contribution

---

11  
12 Huang Qun and Zheng yanlin planned and designed the study. Xiao Xili and Wang  
13 Jing conducted rigorous literature searches and data extraction. Wang Wanjie, Liao  
14 Tingting and Wang Juan conducted the data preparation, quality assessments, and  
15 data analyses. Huang Qun and Zhang Chuantao wrote and revised the manuscript. All  
16 the authors read and approved the final manuscript.  
17  
18  
19

## 20 Declaration of conflicting interest

---

21  
22 The authors declare that there are no competing interests associated with the  
23 manuscript.  
24  
25

## 26 Funding

---

27  
28 This work was supported by Sichuan Science and technology program (grant number  
29 2020JDRC0114), "Xinglin scholar" Research Promotion Project of Chengdu  
30 University of Traditional Chinese Medicine (grant number XSGG2019016,  
31 XGZX2003、JSZX005), "100 Talent Plan" Project of Hospital of Chengdu  
32 University of Traditional Chinese Medicine (grant number Hospital office [2020] 42),  
33 National training program for innovative backbone talents of traditional Chinese  
34 Medicine (grant number No. 91 [2019] of the State Office of Traditional Chinese  
35 Medicine), Science and technology development fund of Hospital of Chengdu  
36 University of traditional Chinese Medicine (grant number 19LW19、18MZ12).  
37  
38 The funder has provided only financial support for the study.  
39  
40  
41

## 42 References

---

- 43  
44 1. Bradley, J.L., et al., *Dry eye disease ranking among common reasons for seeking eye*  
45 *care in a large US claims database*. Clin Ophthalmol, 2019. **13**: p. 225-232.  
46  
47  
48 2. Dana, R., et al., *Estimated Prevalence and Incidence of Dry Eye Disease Based on*  
49 *Coding Analysis of a Large, All-age United States Health Care System*. Am J  
50 Ophthalmol, 2019. **202**: p. 47-54.  
51  
52  
53 3. Yasir, Z.H., et al., *Prevalence and Determinants of Dry Eye Disease among 40 Years*  
54 *and Older Population of Riyadh (Except Capital), Saudi Arabia*. Middle East Afr J  
55  
56  
57  
58  
59  
60

- Ophthalmol, 2019. **26**(1): p. 27-32.
4. Tan, L.L., et al., *Prevalence of and risk factors for symptomatic dry eye disease in Singapore*. Clin Exp Optom, 2015. **98**(1): p. 45-53.
5. Song, P., et al., *Variations of dry eye disease prevalence by age, sex and geographic characteristics in China: a systematic review and meta-analysis*. J Glob Health, 2018. **8**(2): p. 020503.
6. Caffery, B., et al., *Prevalence of dry eye disease in Ontario, Canada: A population-based survey*. Ocul Surf, 2019. **17**(3): p. 526-531.
7. Titiyal, J.S., et al., *Prevalence and risk factors of dry eye disease in North India: Ocular surface disease index-based cross-sectional hospital study*. Indian J Ophthalmol, 2018. **66**(2): p. 207-211.
8. Stapleton, F., et al., *TFOS DEWS II Epidemiology Report*. Ocul Surf, 2017. **15**(3): p. 334-365.
9. Rapoport, Y., et al., *A Comprehensive Review of Sex Disparities in Symptoms, Pathophysiology, and Epidemiology of Dry Eye Syndrome*. Semin Ophthalmol, 2016. **31**(4): p. 325-36.
10. Uchino, M., *What We Know About the Epidemiology of Dry Eye Disease in Japan*. Invest Ophthalmol Vis Sci, 2018. **59**(14): p. 17-23491.
11. McDonald, M., et al., *Economic and Humanistic Burden of Dry Eye Disease in Europe, North America, and Asia: A Systematic Literature Review*. Ocul Surf, 2016. **14**(2): p. 144-67.
12. Craig, J.P., et al., *TFOS DEWS II Definition and Classification Report*. Ocul Surf, 2017.

- 1  
2  
3  
4 15(3): p. 276-283.  
5  
6  
7 13. Kim, M., et al., *Dry eye disease and allergic conditions: A Korean nationwide*  
8  
9 *population-based study*. Am J Rhinol Allergy, 2016. **30**(6): p. 397-401.  
10  
11  
12 14. Nanda, A. and A.N. Wasan, *Asthma in Adults*. Med Clin North Am, 2020. **104**(1): p. 95-  
13  
14 108.  
15  
16  
17 15. Ebmeier, S., et al., *Trends in international asthma mortality: analysis of data from the*  
18  
19 *WHO Mortality Database from 46 countries (1993-2012)*. Lancet, 2017. **390**(10098): p.  
20  
21 935-945.  
22  
23  
24 16. Huang, K., et al., *Prevalence, risk factors, and management of asthma in China: a*  
25  
26 *national cross-sectional study*. Lancet, 2019. **394**(10196): p. 407-418.  
27  
28  
29 17. Holt, P.G. and P.D. Sly, *Viral infections and atopy in asthma pathogenesis: new*  
30  
31 *rationales for asthma prevention and treatment*. Nat Med, 2012. **18**(5): p. 726-35.  
32  
33  
34 18. Busse, W.W., R.F. Lemanske, Jr., and J.E. Gern, *Role of viral respiratory infections in*  
35  
36 *asthma and asthma exacerbations*. Lancet, 2010. **376**(9743): p. 826-34.  
37  
38  
39 19. Sbihi, H., et al., *Thinking bigger: How early-life environmental exposures shape the gut*  
40  
41 *microbiome and influence the development of asthma and allergic disease*. Allergy,  
42  
43 2019. **9**(10): p. 13812.  
44  
45  
46 20. Leiria, L.O., M.A. Martins, and M.J. Saad, *Obesity and asthma: beyond T(H)2*  
47  
48 *inflammation*. Metabolism, 2015. **64**(2): p. 172-81.  
49  
50  
51 21. Hedman, L., et al., *Both environmental tobacco smoke and personal smoking is related*  
52  
53 *to asthma and wheeze in teenagers*. Thorax, 2011. **66**(1): p. 20-5.  
54  
55  
56 22. Papi, A., et al., *Asthma*. Lancet, 2018. **391**(10122): p. 783-800.  
57  
58  
59  
60



- 1  
2  
3  
4 23. Enriquez-de-Salamanca, A., S. Bonini, and M. Calonge, *Molecular and cellular*  
5  
6 *biomarkers in dry eye disease and ocular allergy*. *Curr Opin Allergy Clin Immunol*, 2012.  
7  
8  
9 **12**(5): p. 523-33.  
10  
11 24. Chen, L., et al., *High incidence of dry eye in young children with allergic conjunctivitis*  
12  
13 *in Southwest China*. *Acta Ophthalmol*, 2016. **94**(8): p. e727-e730.  
14  
15 25. Villani, E., G. Rabbio, and P. Nucci, *Ocular allergy as a risk factor for dry eye in adults*  
16  
17 *and children*. *Curr Opin Allergy Clin Immunol*, 2018. **18**(5): p. 398-403.  
18  
19 26. Heck, S., et al., *High probability of comorbidities in bronchial asthma in Germany*. *NPJ*  
20  
21 *Prim Care Respir Med*, 2017. **27**(1): p. 017-0026.  
22  
23 27. Masuda, S., et al., *High prevalence and young onset of allergic rhinitis in children with*  
24  
25 *bronchial asthma*. *Pediatr Allergy Immunol*, 2008. **19**(6): p. 517-22.  
26  
27 28. Huang, Y.C., et al., *Association between dry eye disease and asthma: a nationwide*  
28  
29 *population-based study*. *PeerJ*, 2018. **5**(6).  
30  
31 29. Chia, E.M., et al., *Prevalence and associations of dry eye syndrome in an older*  
32  
33 *population: the Blue Mountains Eye Study*. *Clin Exp Ophthalmol*, 2003. **31**(3): p. 229-  
34  
35 32.  
36  
37 30. Moher, D., et al., *Preferred reporting items for systematic reviews and meta-analyses:*  
38  
39 *the PRISMA statement*. *PLoS Med*, 2009. **6**(7): p. 21.  
40  
41 31. GA Wells, B.S., D O'Connell, J Peterson, V Welch, M Losos, et al. *The Newcastle-*  
42  
43 *Ottawa Scale (NOS) for assessing the quality of nonrandomised studies in meta-*  
44  
45 *analyses*. Available from:  
46  
47 [http://www.ohri.ca/programs/clinical\\_epidemiology/oxford.asp](http://www.ohri.ca/programs/clinical_epidemiology/oxford.asp).  
48  
49  
50  
51  
52  
53  
54  
55  
56  
57  
58  
59  
60

- 1  
2  
3  
4 32. Program, T.A. *Agency for Healthcare Research and Quality*. Available from:  
5  
6 <http://www.ahrq.gov/research/findings/ta/index.html>.  
7  
8  
9 33. Higgins, J.P., et al., *Measuring inconsistency in meta-analyses*. *Bmj*, 2003. **327**(7414):  
10  
11 p. 557-60.  
12  
13 34. Wang, T.J., et al., *Comorbidities of dry eye disease: a nationwide population-based*  
14  
15 *study*. *Acta Ophthalmol*, 2012. **90**(7): p. 663-8.  
16  
17 35. Vehof, J., et al., *Prevalence and risk factors of dry eye disease in a British female cohort*.  
18  
19 *Br J Ophthalmol*, 2014. **98**(12): p. 1712-7.  
20  
21 36. Alshamrani, A.A., et al., *Prevalence and Risk Factors of Dry Eye Symptoms in a Saudi*  
22  
23 *Arabian Population*. *Middle East Afr J Ophthalmol*, 2017. **24**(2): p. 67-73.  
24  
25 37. Dogru, M., et al., *Evaluation of the tear film instability in children with allergic diseases*.  
26  
27 *Cutan Ocul Toxicol*, 2016. **35**(1): p. 49-52.  
28  
29 38. Bielory, L., *Ocular toxicity of systemic asthma and allergy treatments*. *Curr Allergy*  
30  
31 *Asthma Rep*, 2006. **6**(4): p. 299-305.  
32  
33 39. Gibson, P.G. and V.M. McDonald, *Management of severe asthma: targeting the*  
34  
35 *airways, comorbidities and risk factors*. *Intern Med J*, 2017. **47**(6): p. 623-631.  
36  
37 40. Guida, G. and A.M. Riccio, *Immune induction of airway remodeling*. *Semin Immunol*,  
38  
39 2019. **14**(101346): p. 101346.  
40  
41 41. Barabino, S., et al., *Ocular surface immunity: homeostatic mechanisms and their*  
42  
43 *disruption in dry eye disease*. *Prog Retin Eye Res*, 2012. **31**(3): p. 271-85.  
44  
45 42. Wei, Y. and P.A. Asbell, *The core mechanism of dry eye disease is inflammation*. *Eye*  
46  
47 *Contact Lens*, 2014. **40**(4): p. 248-56.  
48  
49  
50  
51  
52  
53  
54  
55  
56  
57  
58  
59  
60

- 1  
2  
3  
4 43. Yamaguchi, T., *Inflammatory Response in Dry Eye*. Invest Ophthalmol Vis Sci, 2018.  
5  
6 59(14): p. 17-23651.  
7  
8  
9 44. Reyes, J.L., et al., *Innate and Adaptive Cell Populations Driving Inflammation in Dry*  
10  
11 *Eye Disease*. Mediators Inflamm, 2018. 12(2532314).  
12  
13  
14 45. Uchino, M., et al., *Prevalence and risk factors of dry eye disease in Japan: Koumi study*.  
15  
16 Ophthalmology, 2011. 118(12): p. 2361-7.  
17  
18  
19 46. Gomes, J.A.P., et al., *TFOS DEWS II iatrogenic report*. Ocul Surf, 2017. 15(3): p. 511-  
20  
21 538.  
22  
23  
24  
25  
26  
27

## Figure Legends

---

28  
29  
30 Figure 1. Flow chart of literature search.

31  
32 Figure 2. Meta-analysis of asthma and DED using a random-effects model.

33  
34 Figure 3. Subgroup analysis by ethnicity of asthma and DED.

35  
36 Figure 4. Funnel plot of a meta-analysis of asthma and DED.  
37  
38  
39  
40  
41  
42  
43  
44  
45  
46  
47  
48  
49  
50  
51  
52  
53  
54  
55  
56  
57  
58  
59  
60

1  
2  
3  
4  
5  
6  
7  
8  
9  
10  
11  
12  
13  
14  
15  
16  
17  
18  
19  
20  
21  
22  
23  
24  
25  
26  
27  
28  
29  
30  
31  
32  
33  
34  
35  
36  
37  
38  
39  
40  
41  
42  
43  
44  
45  
46  
47  
48  
49  
50  
51  
52  
53  
54  
55  
56  
57  
58  
59  
60

For peer review only

1  
2  
3  
4  
5  
6  
7  
8  
9  
10  
11  
12  
13  
14  
15  
16  
17  
18  
19  
20  
21  
22  
23  
24  
25  
26  
27  
28  
29  
30  
31  
32  
33  
34  
35  
36  
37  
38  
39  
40  
41  
42  
43  
44  
45  
46  
47  
48  
49  
50  
51  
52  
53  
54  
55  
56  
57  
58  
59  
60

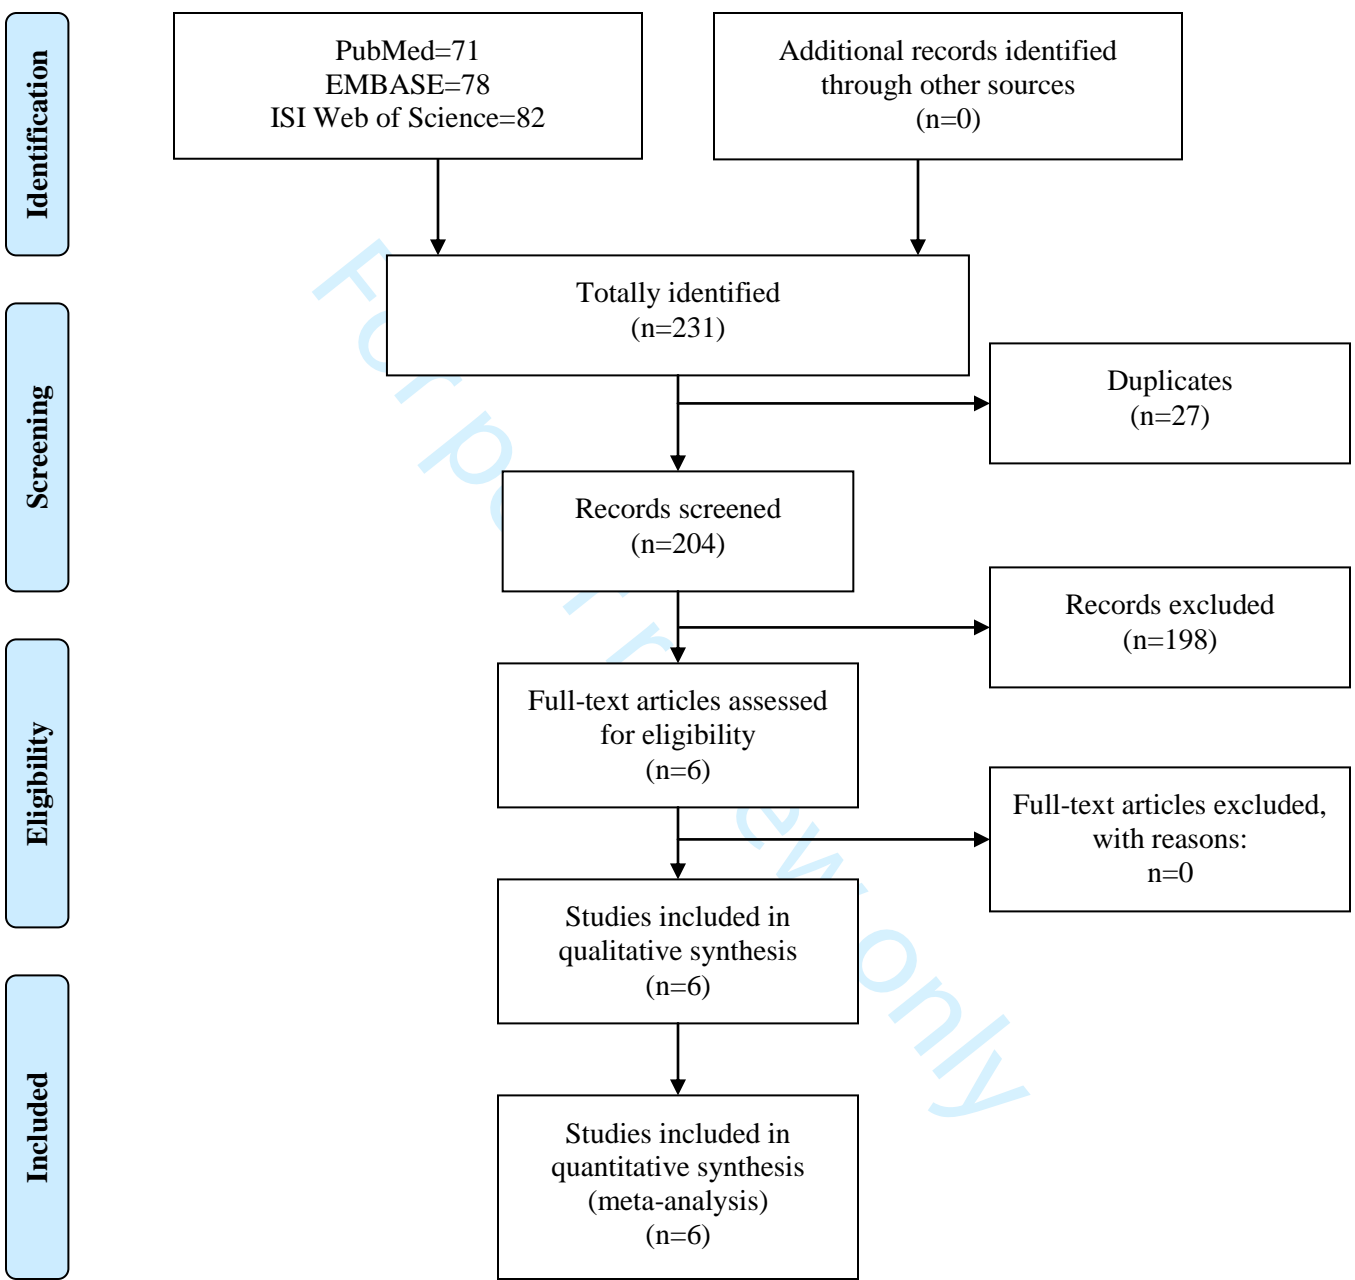

1  
2  
3  
4  
5  
6  
7  
8  
9  
10  
11  
12  
13  
14  
15  
16  
17  
18  
19  
20  
21  
22  
23  
24  
25  
26  
27  
28  
29  
30  
31  
32  
33  
34  
35  
36  
37  
38  
39  
40  
41  
42  
43  
44  
45  
46  
47  
48  
49  
50  
51  
52  
53  
54  
55  
56  
57  
58  
59  
60

For peer review only

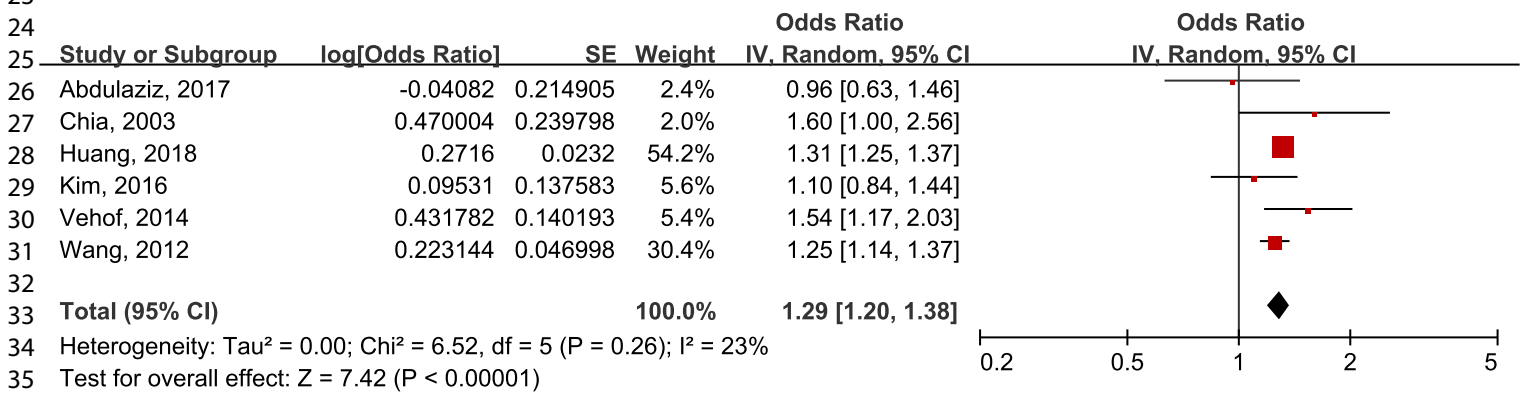

only

1  
2  
3  
4  
5  
6  
7  
8  
9  
10  
11  
12  
13  
14  
15  
16  
17  
18  
19  
20  
21  
22  
23  
24  
25  
26  
27  
28  
29  
30  
31  
32  
33  
34  
35  
36  
37  
38  
39  
40  
41  
42  
43  
44  
45  
46  
47  
48  
49  
50  
51  
52  
53  
54  
55  
56  
57  
58  
59  
60

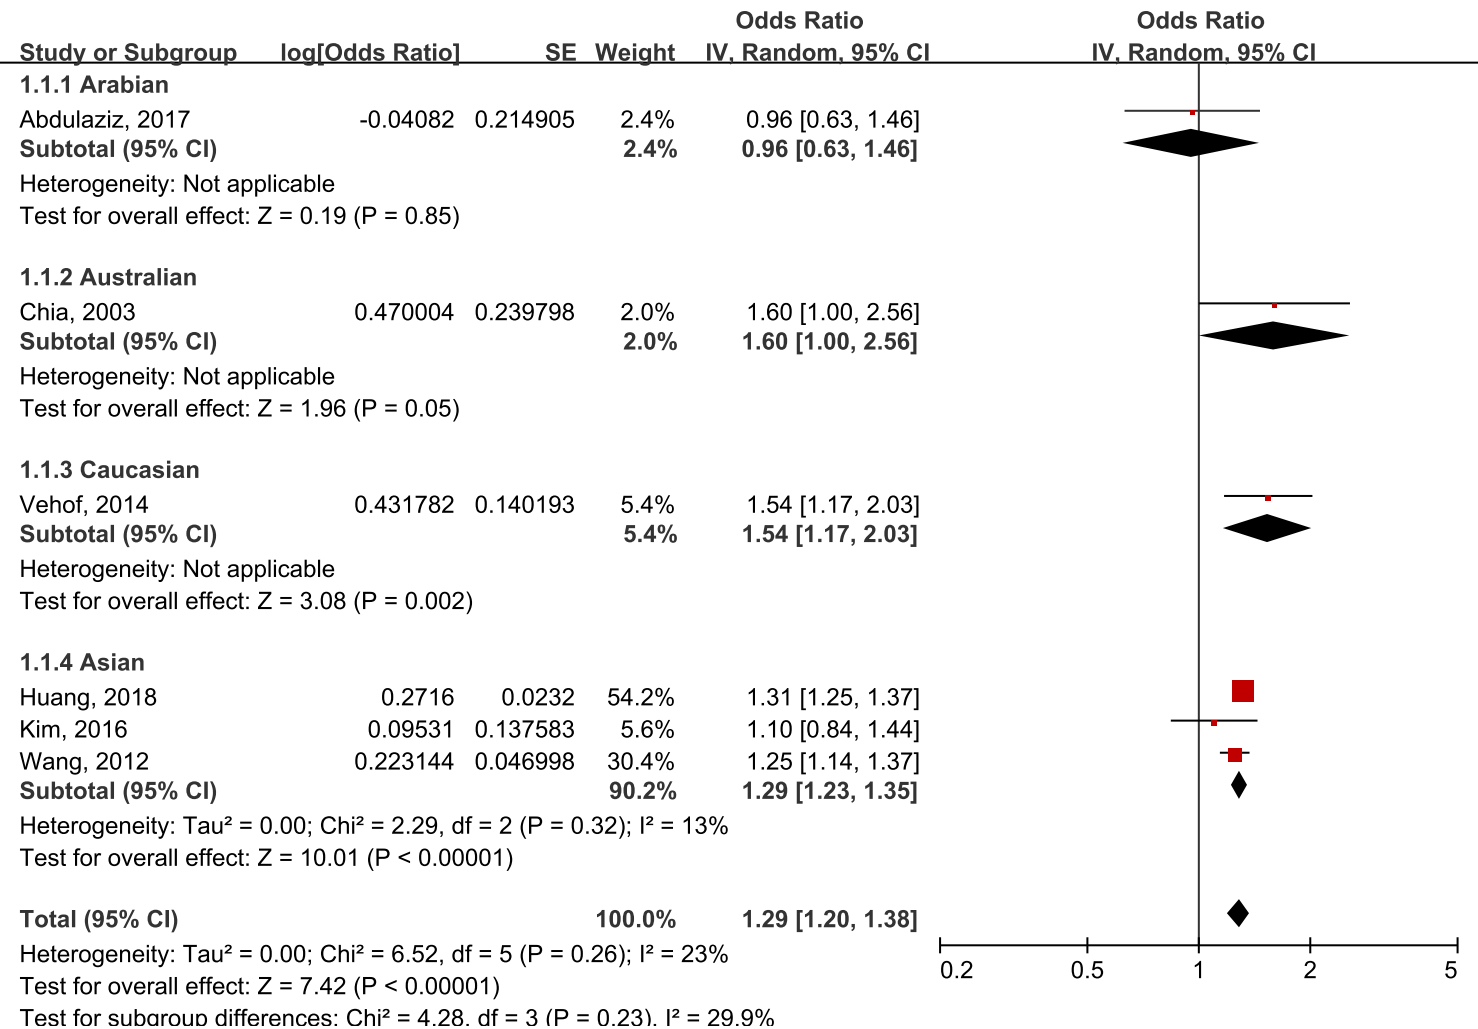

1  
2  
3  
4  
5  
6  
7  
8  
9  
10  
11  
12  
13  
14  
15  
16  
17  
18  
19  
20  
21  
22  
23  
24  
25  
26  
27  
28  
29  
30  
31  
32  
33  
34  
35  
36  
37  
38  
39  
40  
41  
42  
43  
44  
45  
46  
47  
48  
49  
50  
51  
52  
53  
54  
55  
56  
57  
58  
59  
60

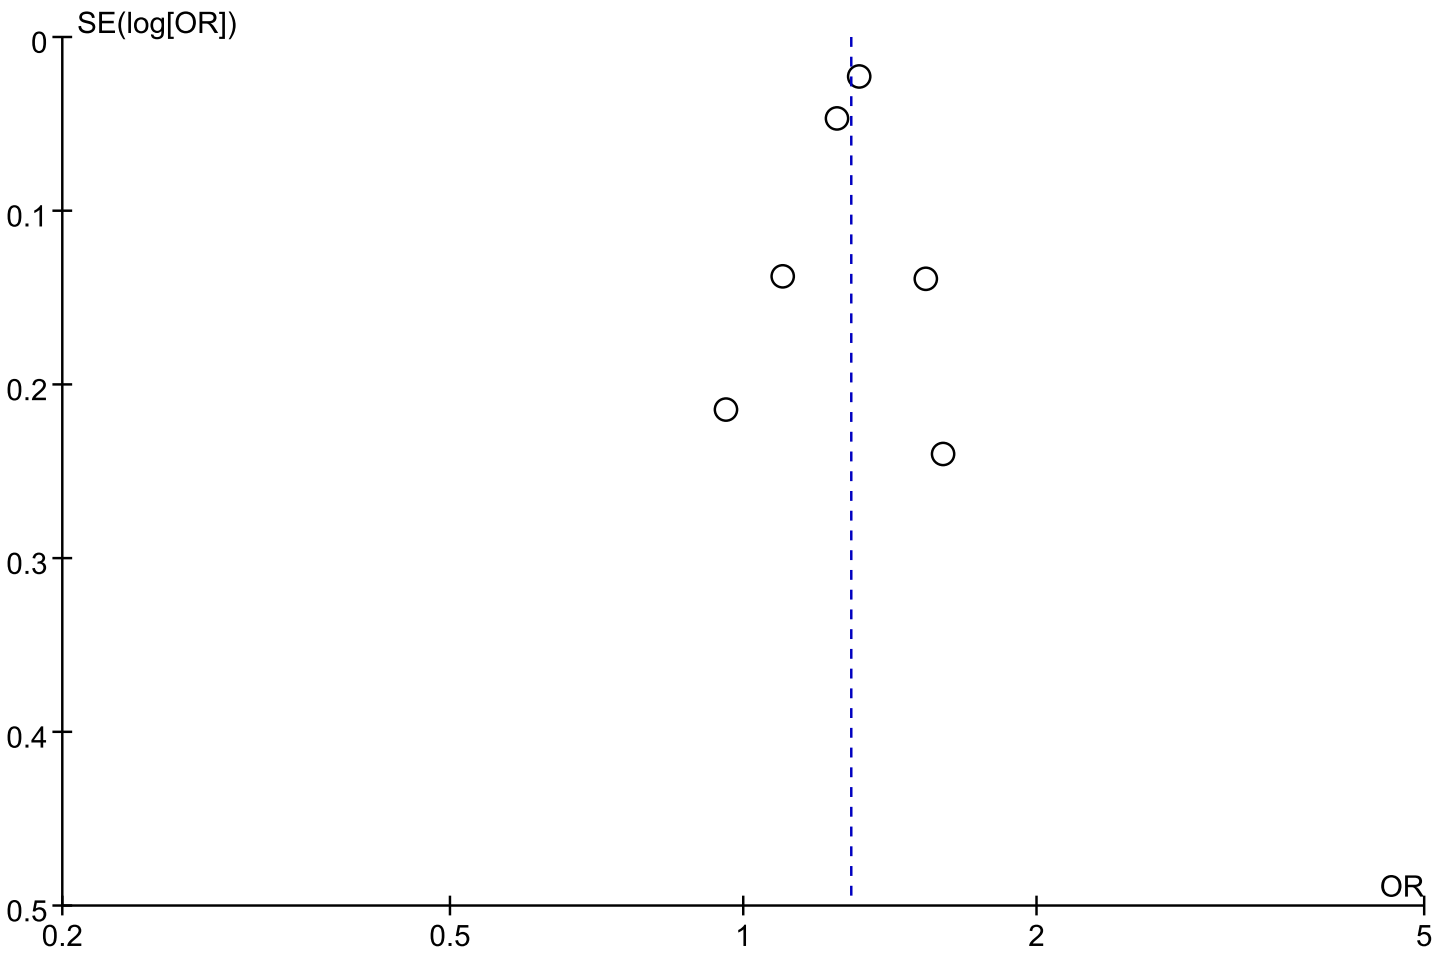



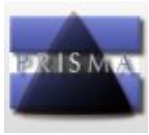

## PRISMA 2009 Flow Diagram

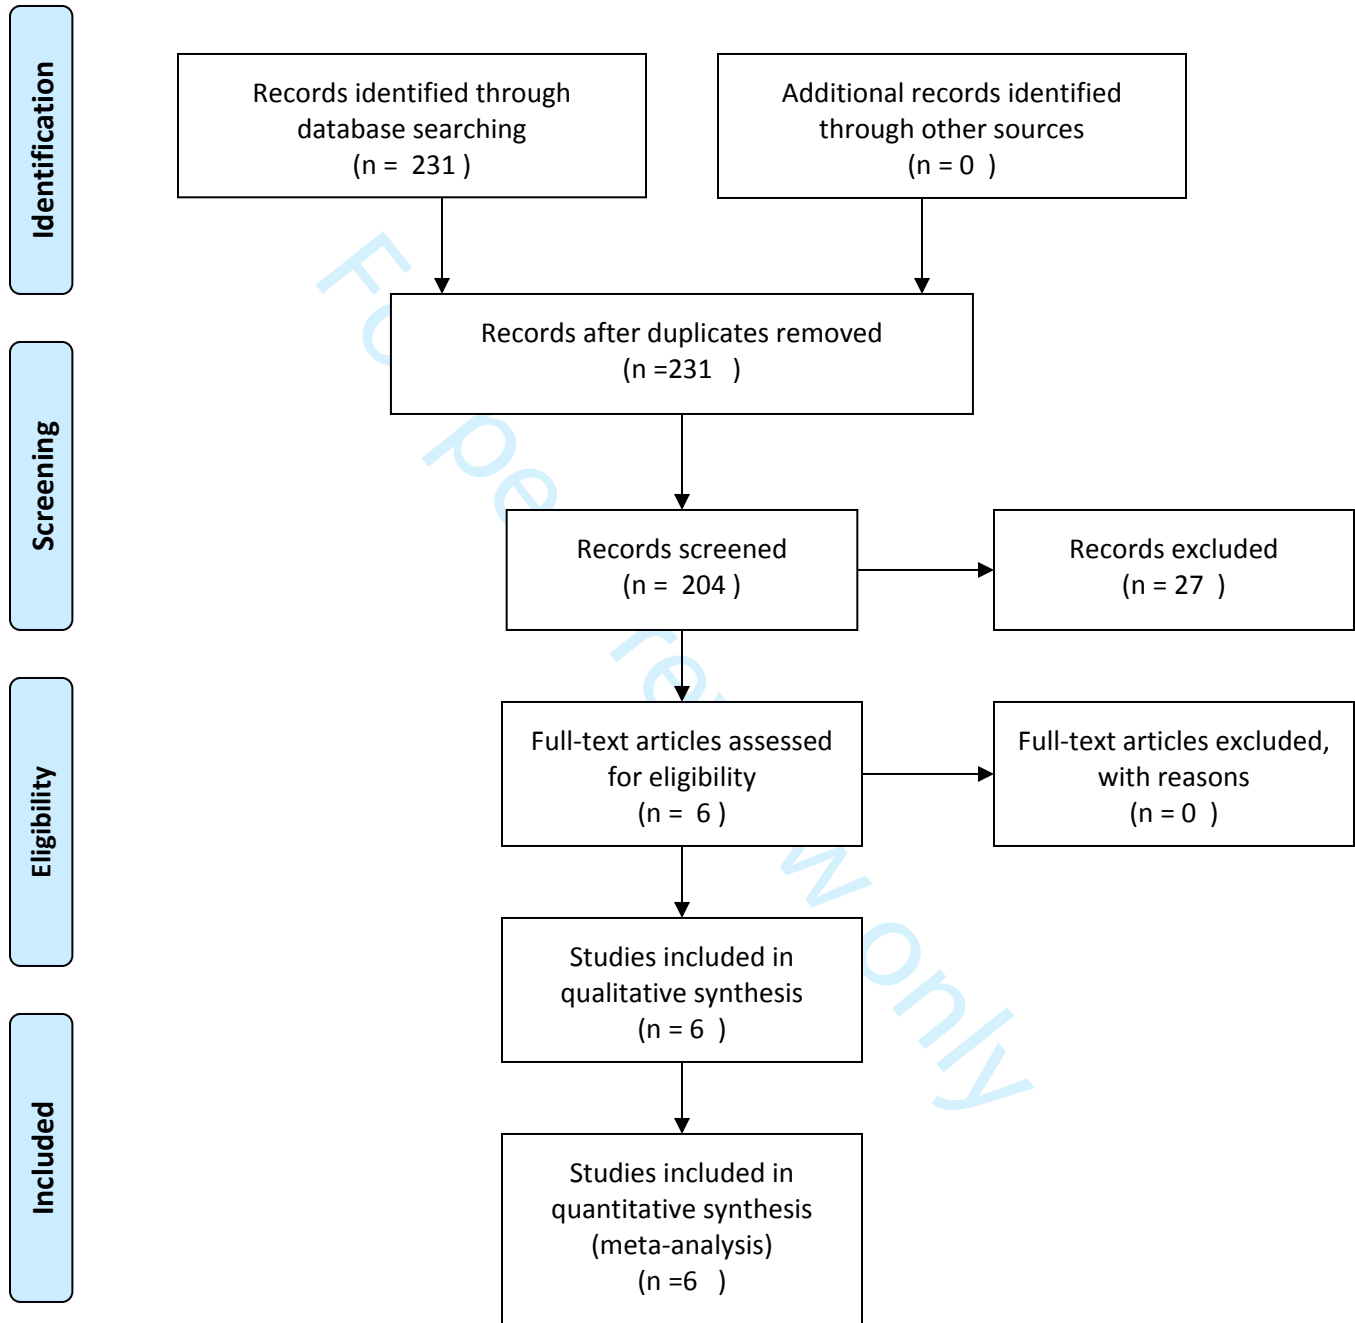

From: Moher D, Liberati A, Tetzlaff J, Altman DG, The PRISMA Group (2009). Preferred Reporting Items for Systematic Reviews and Meta-Analyses: The PRISMA Statement. PLoS Med 6(7): e1000097. doi:10.1371/journal.pmed1000097

For more information, visit [www.prisma-statement.org](http://www.prisma-statement.org).

For peer review only - <http://bmjopen.bmj.com/site/about/guidelines.xhtml>

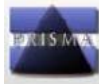

# PRISMA 2009 Checklist

| Section/topic                      | #  | Checklist item                                                                                                                                                                                                                                                                                              | Reported on page # |
|------------------------------------|----|-------------------------------------------------------------------------------------------------------------------------------------------------------------------------------------------------------------------------------------------------------------------------------------------------------------|--------------------|
| <b>TITLE</b>                       |    |                                                                                                                                                                                                                                                                                                             |                    |
| Title                              | 1  | Identify the report as a systematic review, meta-analysis, or both.                                                                                                                                                                                                                                         | 1                  |
| <b>ABSTRACT</b>                    |    |                                                                                                                                                                                                                                                                                                             |                    |
| Structured summary                 | 2  | Provide a structured summary including, as applicable: background; objectives; data sources; study eligibility criteria, participants, and interventions; study appraisal and synthesis methods; results; limitations; conclusions and implications of key findings; systematic review registration number. | 1-2                |
| <b>INTRODUCTION</b>                |    |                                                                                                                                                                                                                                                                                                             |                    |
| Rationale                          | 3  | Describe the rationale for the review in the context of what is already known.                                                                                                                                                                                                                              | 2-3                |
| Objectives                         | 4  | Provide an explicit statement of questions being addressed with reference to participants, interventions, comparisons, outcomes, and study design (PICOS).                                                                                                                                                  | 3                  |
| <b>METHODS</b>                     |    |                                                                                                                                                                                                                                                                                                             |                    |
| Protocol and registration          | 5  | Indicate if a review protocol exists, if and where it can be accessed (e.g., Web address), and, if available, provide registration information including registration number.                                                                                                                               | 3                  |
| Eligibility criteria               | 6  | Specify study characteristics (e.g., PICOS, length of follow-up) and report characteristics (e.g., years considered, language, publication status) used as criteria for eligibility, giving rationale.                                                                                                      | 3-4                |
| Information sources                | 7  | Describe all information sources (e.g., databases with dates of coverage, contact with study authors to identify additional studies) in the search and date last searched.                                                                                                                                  | 3                  |
| Search                             | 8  | Present full electronic search strategy for at least one database, including any limits used, such that it could be repeated.                                                                                                                                                                               | 3                  |
| Study selection                    | 9  | State the process for selecting studies (i.e., screening, eligibility, included in systematic review, and, if applicable, included in the meta-analysis).                                                                                                                                                   | 3-4                |
| Data collection process            | 10 | Describe method of data extraction from reports (e.g., piloted forms, independently, in duplicate) and any processes for obtaining and confirming data from investigators.                                                                                                                                  | 4                  |
| Data items                         | 11 | List and define all variables for which data were sought (e.g., PICOS, funding sources) and any assumptions and simplifications made.                                                                                                                                                                       | 4                  |
| Risk of bias in individual studies | 12 | Describe methods used for assessing risk of bias of individual studies (including specification of whether this was done at the study or outcome level), and how this information is to be used in any data synthesis.                                                                                      | 4-5                |
| Summary measures                   | 13 | State the principal summary measures (e.g., risk ratio, difference in means).                                                                                                                                                                                                                               | 4-5                |
| Synthesis of results               | 14 | Describe the methods of handling data and combining results of studies, if done, including measures of consistency (e.g., I <sup>2</sup> ) for each meta-analysis.                                                                                                                                          | 4-5                |

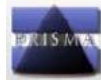

# PRISMA 2009 Checklist

Page 1 of 2

| Section/topic                 | #  | Checklist item                                                                                                                                                                                           | Reported on page # |
|-------------------------------|----|----------------------------------------------------------------------------------------------------------------------------------------------------------------------------------------------------------|--------------------|
| Risk of bias across studies   | 15 | Specify any assessment of risk of bias that may affect the cumulative evidence (e.g., publication bias, selective reporting within studies).                                                             | 4-5                |
| Additional analyses           | 16 | Describe methods of additional analyses (e.g., sensitivity or subgroup analyses, meta-regression), if done, indicating which were pre-specified.                                                         | 4-5                |
| <b>RESULTS</b>                |    |                                                                                                                                                                                                          |                    |
| Study selection               | 17 | Give numbers of studies screened, assessed for eligibility, and included in the review, with reasons for exclusions at each stage, ideally with a flow diagram.                                          | 5                  |
| Study characteristics         | 18 | For each study, present characteristics for which data were extracted (e.g., study size, PICOS, follow-up period) and provide the citations.                                                             | 5                  |
| Risk of bias within studies   | 19 | Present data on risk of bias of each study and, if available, any outcome level assessment (see item 12).                                                                                                | 5                  |
| Results of individual studies | 20 | For all outcomes considered (benefits or harms), present, for each study: (a) simple summary data for each intervention group (b) effect estimates and confidence intervals, ideally with a forest plot. | 6                  |
| Synthesis of results          | 21 | Present results of each meta-analysis done, including confidence intervals and measures of consistency.                                                                                                  | 6                  |
| Risk of bias across studies   | 22 | Present results of any assessment of risk of bias across studies (see Item 15).                                                                                                                          | 6                  |
| Additional analysis           | 23 | Give results of additional analyses, if done (e.g., sensitivity or subgroup analyses, meta-regression [see Item 16]).                                                                                    | 5-6                |
| <b>DISCUSSION</b>             |    |                                                                                                                                                                                                          |                    |
| Summary of evidence           | 24 | Summarize the main findings including the strength of evidence for each main outcome; consider their relevance to key groups (e.g., healthcare providers, users, and policy makers).                     | 7                  |
| Limitations                   | 25 | Discuss limitations at study and outcome level (e.g., risk of bias), and at review-level (e.g., incomplete retrieval of identified research, reporting bias).                                            | 7                  |
| Conclusions                   | 26 | Provide a general interpretation of the results in the context of other evidence, and implications for future research.                                                                                  | 7                  |
| <b>FUNDING</b>                |    |                                                                                                                                                                                                          |                    |
| Funding                       | 27 | Describe sources of funding for the systematic review and other support (e.g., supply of data); role of funders for the systematic review.                                                               | 8                  |

From: Moher D, Liberati A, Tetzlaff J, Altman DG, The PRISMA Group (2009). Preferred Reporting Items for Systematic Reviews and Meta-Analyses: The PRISMA Statement. PLoS Med 6(7): e1000097. doi:10.1371/journal.pmed1000097

For more information, visit: [www.prisma-statement.org](http://www.prisma-statement.org).

Page 2 of 2

For peer review only - <http://bmjopen.bmj.com/site/about/guidelines.xhtml>

# BMJ Open

## Association between asthma and dry eye disease: A meta-analysis based on observational studies

|                                 |                                                                                                                                                                                                                                                                                                                                                                                                                                                                                                                                                                                                                                                                                                                                                                                                                                                                             |
|---------------------------------|-----------------------------------------------------------------------------------------------------------------------------------------------------------------------------------------------------------------------------------------------------------------------------------------------------------------------------------------------------------------------------------------------------------------------------------------------------------------------------------------------------------------------------------------------------------------------------------------------------------------------------------------------------------------------------------------------------------------------------------------------------------------------------------------------------------------------------------------------------------------------------|
| Journal:                        | <i>BMJ Open</i>                                                                                                                                                                                                                                                                                                                                                                                                                                                                                                                                                                                                                                                                                                                                                                                                                                                             |
| Manuscript ID                   | bmjopen-2020-045275.R1                                                                                                                                                                                                                                                                                                                                                                                                                                                                                                                                                                                                                                                                                                                                                                                                                                                      |
| Article Type:                   | Original research                                                                                                                                                                                                                                                                                                                                                                                                                                                                                                                                                                                                                                                                                                                                                                                                                                                           |
| Date Submitted by the Author:   | 20-May-2021                                                                                                                                                                                                                                                                                                                                                                                                                                                                                                                                                                                                                                                                                                                                                                                                                                                                 |
| Complete List of Authors:       | <p>huang, qun; Chengdu University of Traditional Chinese Medicine Affiliated Hospital, Ophthalmology; Chengdu University of TCM</p> <p>Zheng, Yanlin; Chengdu University of Traditional Chinese Medicine Affiliated Hospital, Ophthalmology; Chengdu University of Traditional Chinese Medicine,</p> <p>zhang, chuantao; Chengdu University of Traditional Chinese Medicine Affiliated Hospital</p> <p>wang, wanjie; Chengdu University of Traditional Chinese Medicine Affiliated Hospital</p> <p>liao, tingting; Chengdu University of Traditional Chinese Medicine Affiliated Hospital</p> <p>xiao, xili; Chengdu University of Traditional Chinese Medicine Affiliated Hospital</p> <p>wang, jing; Chengdu University of Traditional Chinese Medicine Affiliated Hospital</p> <p>wang, juan; Chengdu University of Traditional Chinese Medicine Affiliated Hospital</p> |
| <b>Primary Subject Heading</b>: | Evidence based practice                                                                                                                                                                                                                                                                                                                                                                                                                                                                                                                                                                                                                                                                                                                                                                                                                                                     |
| Secondary Subject Heading:      | Ophthalmology                                                                                                                                                                                                                                                                                                                                                                                                                                                                                                                                                                                                                                                                                                                                                                                                                                                               |
| Keywords:                       | Medical ophthalmology < OPHTHALMOLOGY, Asthma < THORACIC MEDICINE, Paediatric ophthalmology < OPHTHALMOLOGY, Orbital and lacrimal disorders < OPHTHALMOLOGY                                                                                                                                                                                                                                                                                                                                                                                                                                                                                                                                                                                                                                                                                                                 |
|                                 |                                                                                                                                                                                                                                                                                                                                                                                                                                                                                                                                                                                                                                                                                                                                                                                                                                                                             |

SCHOLARONE™  
Manuscripts

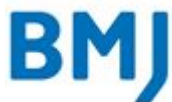

I, the Submitting Author has the right to grant and does grant on behalf of all authors of the Work (as defined in the below author licence), an exclusive licence and/or a non-exclusive licence for contributions from authors who are: i) UK Crown employees; ii) where BMJ has agreed a CC-BY licence shall apply, and/or iii) in accordance with the terms applicable for US Federal Government officers or employees acting as part of their official duties; on a worldwide, perpetual, irrevocable, royalty-free basis to BMJ Publishing Group Ltd ("BMJ") its licensees and where the relevant Journal is co-owned by BMJ to the co-owners of the Journal, to publish the Work in this journal and any other BMJ products and to exploit all rights, as set out in our [licence](#).

The Submitting Author accepts and understands that any supply made under these terms is made by BMJ to the Submitting Author unless you are acting as an employee on behalf of your employer or a postgraduate student of an affiliated institution which is paying any applicable article publishing charge ("APC") for Open Access articles. Where the Submitting Author wishes to make the Work available on an Open Access basis (and intends to pay the relevant APC), the terms of reuse of such Open Access shall be governed by a Creative Commons licence – details of these licences and which [Creative Commons](#) licence will apply to this Work are set out in our licence referred to above.

Other than as permitted in any relevant BMJ Author's Self Archiving Policies, I confirm this Work has not been accepted for publication elsewhere, is not being considered for publication elsewhere and does not duplicate material already published. I confirm all authors consent to publication of this Work and authorise the granting of this licence.

# Association between asthma and dry eye disease: A meta-analysis based on observational studies

## Running title: asthma and DED

Huang Qun<sup>1\*</sup>, M.M., Zheng Yanlin<sup>2†</sup>, M.M., Zhang Chuantao<sup>3</sup>, M.D., Wang Wanjie<sup>1</sup>, M.M., Liao Tingting<sup>4</sup>, Xiao Xili<sup>1</sup>, M.M., Wang Jing<sup>1</sup>, M.M., Wang Juan<sup>1</sup>, M.B

1 Department of Ophthalmology, Hospital of Chengdu University of Traditional Chinese Medicine, Chengdu, China.

2 Clinical Medical College, Chengdu University of Traditional Chinese Medicine, Chengdu, China.

3 Department of Respiratory Medicine, Hospital of Chengdu University of Traditional Chinese Medicine, Chengdu, China.

4. Department of endocrinology, Hospital of Chengdu University of Traditional Chinese Medicine, Chengdu, China.

\* first author, E-mail: skirth@163.com

† Corresponding author, E-mail: zhengyanlin@cdutcm.edu.cn

**Abbreviations:** DED, dry eye disease; PRISMA, Preferred Reporting Items for Systematic Review and Meta-Analyses; MeSH, Medical Subject Headings; OR, odds ratio; NOS, Newcastle-Ottawa Scale;

## ABSTRACT

---

### Objective

This study aimed to systematically review the relationship between DED and asthma based on published population-based studies.

### Design

Systematic review and meta- analysis.

### Methods and analysis

Observational studies addressing the association between asthma and DED were searched using three electronic databases (PubMed, EMBASE, and ISI Web of Science) from their inception up to October 1, 2019. Search terms included a combination of Medical Subject Headings and free words related to “asthma” and “dry eye disease.” Two reviewers independently conducted the literature search, data extraction, and quality assessment and were blinded to the other reviewers. The associations were indicated as odds ratios (ORs) with 95% confidence intervals (95% CIs) and combined using RevMan 5.3 software. Subgroup analysis according to ethnicity was performed to test the influence of ethnicity on the association.

### Results

Six independent studies were included in this review and had an average of seven stars by the Newcastle-Ottawa Scale. Our current findings suggest that the prevalence of DED was higher in the asthma group than in the control group ( $Z = 7.42$ ,  $P < 0.00001$ ; OR 1.29, 95% CI 1.20–1.38). In the subgroup analysis by ethnicity, Australian, Caucasian, and Asian patients with asthma showed an increased risk of DED.

### Conclusion

The results of our meta-analysis showed a clear association between asthma and DED in the overall population. Patients with asthma had an increased chance of developing DED, and this difference in the correlation existed among different countries. However, this significant association may not reflect a causal effect due to the cross-sectional design of the included studies.

**OSF registration number** DOI 10.17605/OSF.IO/UHN38).

### Strengths and limitations of this study

---

1. This is the first meta-analytical report to evaluate the association between asthma and DED.
2. The results of our meta-analysis revealed a clear association between asthma and DED.

1  
2  
3           3. As a general defect in the meta-analysis of observational studies, we  
4 cannot rule out the possibility that certain residual factors that may link asthma  
5 and DED.  
6  
7

8           4. Due to geographic and cultural differences, the lack of universal  
9 diagnostic criteria can affect the association between asthma and the incidence of  
10 DED.  
11  
12

### 13 **Keywords**

---

14  
15 Dry eye disease; asthma; meta-analysis  
16  
17  
18  
19  
20  
21  
22  
23  
24  
25  
26  
27  
28  
29  
30  
31  
32  
33  
34  
35  
36  
37  
38  
39  
40  
41  
42  
43  
44  
45  
46  
47  
48  
49  
50  
51  
52  
53  
54  
55  
56  
57  
58  
59  
60



## INTRODUCTION

---

Dry eye disease (DED) has been the focus of attention in recent years, as it is one of the main reasons for seeking eye care in eye clinics.[1] According to surveys, the prevalence of DED is estimated to be between 5% and 50%.[2-8] the frequency of which increases with age.[9] The prevalence is driven mainly by the classification of DED, with the prevalence of signs being much higher (up to 75%) compared to symptoms.[8] The economic burden and impact of DED is considerable in terms of vision, quality of life, work productivity, and the psychological and physical impact of pain. Therefore, indirect costs account for the largest proportion of total costs because of the significant decline in work efficiency.[8, 10, 11]

DED is considered to be a multifactorial disease of the ocular surface characterized by a loss of homeostasis of the tear film accompanied by ocular symptoms, in which tear film instability and hyperosmolarity, ocular surface inflammation and damage, and neurosensory abnormalities play etiological roles.[12] Clear factors currently known to be associated with the onset of DED include age, sex, and hormones, but in recent years, it has also been found that DED is associated with asthma, allergic rhinitis, and atopic dermatitis.[13]

Asthma is one of the most common chronic immunological diseases in humans, affecting 1%–18% of the population in different countries.[14] Specifically, the prevalence of asthma varies depending on whether the disease is diagnosed by a medical doctor (4.3%), clinical/treated asthma (4.5%), or symptoms such as wheezing (8.6%), and varies by up to 21 times in different countries.[15] Its mortality rate is estimated to 0.19 deaths per 100, 000 people.[16--17] The etiology of asthma is multifactorial, including atopic sensitization,[18] viral respiratory infections,[19] environmental exposures,[20] obesity,[21] and smoking [22]. Asthma is considered to be the result of complex genetic-environmental interactions, with heterogeneity in the clinical manifestations and the type and intensity of airway inflammation and remodeling.[23]

Increasing evidence suggests that DED is associated with a high risk of ocular allergy. [24-25] Ocular allergy, particularly the severe forms of keratoconjunctivitis, has an impact on different key mechanisms of DED, including tear film instability, ocular surface inflammation and damage, and neurosensory abnormalities.[26] Moreover, patients with asthma also often have allergic comorbidities such as allergic rhinitis, allergic conjunctivitis, atopic dermatitis, food allergy, and drug allergy.[27-28] Recently, several studies have highlighted the possible relationship between DED and asthma.[29-30] However, a possible relationship between asthma and DED remains under investigation, and well-established information is very limited. To the best of our knowledge, no meta-analysis has been performed to assess the relationship between asthma and DED. Thus, we performed the current meta-analysis to determine whether there is a link between asthma and DED using a meta-analytic approach to quantify such associations.

## METHODS

---

This systematic review and meta-analysis conformed to the Preferred Reporting Items for Systematic Review and Meta-Analyses (PRISMA) guidelines.[31]

### ETHICAL APPROVAL

Ethical approval, informed consent, and patient and public involvement statements were not necessary because all the data used for the analyses were extracted from available publications. The meta-analysis has been registered in the Open Science Framework (registration number: DOI 10.17605/OSF.IO/UHN38).

### LITERATURE SEARCH STRATEGY

Referring to the search strategy suggested by Cochrane, two researchers independently and systematically searched three electronic databases, including PubMed, EMBASE, and ISI Web of Science, from the database inception date until October 1, 2019, without language restrictions. A combination of Medical Subject Terms (MeSHs) and free terms was used to retrieve possibly eligible publications in each electronic database, and the English search strategy was as follows: (asthma or wheeze or “Asthma”[MeSH]) and (dry eye or dry eye disease or keratoconjunctivitis sicca or xerophthalmia or Sjogren's syndrome or “dry eye syndrome” [MeSH]). For Chinese academic databanks, we used “gan yan” and “xiao chuan” to identify relevant Chinese articles. We also manually screened the reference lists of the original and review articles for additional eligible studies.

### INCLUSION CRITERIA

The inclusion criteria were as follows: (i) the diagnosis of asthma and DED in the study group was based on well-established criteria or according to a clinical diagnosis made by clinical physicians; (ii) control subjects should be free of any history of asthma or DED, no specific restriction on sex and age was imposed; (iii) types of study were observational studies, including cross-sectional, cohort, case-control, or epidemiological studies; (iv) the main outcome was the association between DED and asthma, as indicated by odds ratio (OR) and the associated 95% confidence intervals (CI), which should be either provided directly in the original article or could be calculated based on the original data. If studies with overlapping participants were encountered, reports with the largest sample and the most recent reports were included in the present meta-analysis. If no data was available in the original article, the corresponding author of the relevant study was contacted via email. If the corresponding author did not respond after we sent three e-mails, this article was not used for quantitative synthesis. Abstracts, editorial letters, reviews, case reports, book chapters, and organizational guidelines were excluded from the analysis.

## DATA EXTRACTION

According to the predetermined inclusion criteria, two reviewers (XXL and WJ) independently conducted the literature search, data extraction, and quality assessment and were blinded to the findings of the other reviewer. After rigorous screening, the following data regarding the characteristics of the studies were extracted using a standardized collection form: first author, year of publication, country where the study was conducted, sample size, demographic characteristics of participants in different groups, strategies for confirmation of DED and asthma, and adjustment of confounding factors for effect assessment. Disagreements that occurred during the study selection were resolved through a discussion with a third reviewer (ZYL) until a consensus was reached.

## QUALITY ASSESSMENT

The Newcastle-Ottawa Scale (NOS) was used to assess the risk of bias in case-control and cohort studies.[32] The methodological quality of the cross-sectional studies was evaluated according to the standards of the Agency for Healthcare Research and Quality.[33] Two reviewers (WWJ and WJ) independently conducted quality assessments of the included studies and compared the results. The third reviewer (ZYL) was consulted in case of discrepancies regarding quality assessment.

## DATA SYNTHESIS AND ANALYSIS

RevMan 5.3 (Copenhagen: the Nordic Cochrane Center, the Cochrane Collaboration, 2014) was used for the meta-analysis and subgroup analysis. The association between asthma and DED was estimated using adjusted OR and unadjusted OR, and the upper and lower limits of the 95%CI were extracted from each study. The confounding factors included age and sex. Before combining the data from the included studies, statistical heterogeneity among studies for each outcome was estimated using a standard Chi-square test and the Higgins  $I^2$  test ( $P > 0.1$ ,  $I^2 < 50\%$  indicated acceptable heterogeneity [34]). In the meta-analyses of multiple studies for a specific outcome, a random-effect estimate was calculated for pooling data across studies if statistical heterogeneity existed; however, if a low heterogeneity was detected in the meta-analysis, a random-effect estimate was also calculated, as the validity of tests of heterogeneity could be limited with a small number of component studies. In the case of high heterogeneity, subgroup analysis was carried out by ethnicity, as it was the only confounding factor consistently presented in our selected studies. Sensitivity analysis was conducted by omitting one study at a time and evaluating the resulting effect to determine the potential source of heterogeneity. Begg's rank correlation test and Egger's linear regression test using Stata version 12.0 (Stata Corp LP, USA) were used to evaluate publication bias. Statistical significance was set at  $P < 0.05$  (1-sided), except for tests of heterogeneity.

## PATIENT AND PUBLIC INVOLVEMENT

There was no involvement of patients or public during the outline of this project.

## RESULTS

---

### LITERATURE SEARCH

A total of 231 potential literature citations were searched initially, including 71 records from PubMed, 78 from EMBASE, and 82 from ISI Web of Science (Figure 1). Additionally, 27 duplicate articles were excluded. Based on the predetermined selection criteria, 198 studies were excluded at the title and abstract stages, and six potentially relevant studies were selected and retrieved for full-text reading and evaluation of data integrity. Finally, six studies [13, 29, 30, 35-37] met all the inclusion criteria for this systematic review and were included.

### STUDY CHARACTERISTICS

Overall, the sample sizes of the included studies ranged from 1174 to 105794, of which a total of 45215 patients with asthma and 232864 control subjects were included. The included studies were published between 2003 and 2018 and involved different ethnicities, including Arabian, Australian, Asian, and Caucasian populations. The assessment of asthma and DED was inconsistent between studies, and detailed data on the main characteristics of these studies are shown in Table 1.

### RISK OF BIAS ASSESSMENT

The methodological quality of the included studies was considered low to high, according to the NOS. Six included studies achieved an average of seven stars, and two studies [29, 35] gained nine stars (Table 2).

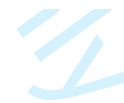

Table 1. Main characteristics of included studies.

| Study            | Country      | Ethnicity  | Study design    | Sample size                      | Mean age | Definition of asthma                   | Definition of DED                      | Adjustment for confounders                                                            |
|------------------|--------------|------------|-----------------|----------------------------------|----------|----------------------------------------|----------------------------------------|---------------------------------------------------------------------------------------|
| Alshamrani, 2017 | Saudi Arabia | Arabian    | Cross-sectional | Asthma: 139<br>Control: 1719     | 39.3     | Questionnaire                          | Six-item questionnaire                 | Age, gender and smoking                                                               |
| Chia, 2003       | Australia    | Australian | Cross-sectional | Asthma: 135<br>Control: 1039     | 60.8     | Medical history of confirmed diagnosis | Interviewer-administered questionnaire | Age and gender                                                                        |
| Huang, 2018      | Taiwan       | Asian      | Cohort          | Asthma: 41229<br>Control: 164916 | 49.56    | ICD-9-CM 493                           | ICD-9-CM 375.15                        | Age and gender                                                                        |
| Kim, 2016        | Korea        | Asian      | Cross-sectional | Asthma: 556<br>Control: 16494    | 50.88    | Medical history                        | Interviewer-administered questionnaire | Age, gender, residential area, education level, occupation and history of eye surgery |
| Vehof, 2014      | UK           | Caucasian  | Cross-sectional | Asthma: 608<br>Control: 3216     | 57.1     | Medical history                        | ICD-9-CM 375.15                        | Age and gender                                                                        |
| Wang, 2012       | Taiwan       | Asian      | Cross-sectional | Asthma: 2548<br>Control: 45480   | 52.4     | Elixhauser comorbidity index           | ICD-9-CM 375.15                        | Age, gender, urbanization levels and monthly incomes                                  |

DED: dry eye diseases

Table 2. Quality assessment of included studies according to the Newcastle-Ottawa Scale.

| Item/Study                                        | Alshamrani,<br>2017 | Chia,<br>2003 | Huang,<br>2018 | Kim,<br>2016 | Vehof,<br>2014 | Wang,<br>2012 |
|---------------------------------------------------|---------------------|---------------|----------------|--------------|----------------|---------------|
| Adequate definition of cases                      | *                   | *             | *              | *            | *              | *             |
| Representativeness of cases                       | *                   | -             | *              | *            | -              | *             |
| Selection of control subjects                     | -                   | -             | *              | *            | -              | *             |
| Definition of control subjects                    | *                   | *             | *              | *            | *              | *             |
| Control for important factor or additional factor | -                   | -             | **             | -            | *              | **            |
| Exposure assessment                               | *                   | *             | *              | *            | *              | *             |
| Same method of ascertainment for all subjects     | *                   | *             | *              | *            | *              | *             |
| Non-response rate                                 | *                   | *             | *              | *            | *              | *             |

A study could be awarded a maximum of one star for each item except for the item "Control for important factor or additional factor".

The definition/explanation of each column of the Newcastle-Ottawa Scale is available from

([http://www.ohri.ca/programs/clinical\\_epidemiology/oxford.asp](http://www.ohri.ca/programs/clinical_epidemiology/oxford.asp)).

## META-ANALYSES

A random effects model was selected to analyze the effect size with modest heterogeneity among the studies ( $I^2 = 23\%$ ,  $P = 0.26$ ). The asthma group had a significantly higher prevalence of DED than the control group (OR 1.29, 95%CI 1.20–1.38;  $P < 0.00001$ ). In brief, there was a significant association between asthma and DED (Figure 2). Owing to the lack of data, it was not possible to detect an association between asthma and diverse subtypes of DED.

## SUBGROUP ANALYSIS AND SENSITIVITY ANALYSIS

Subgroup analysis was performed according to ethnicity (Figure 3). In the stratified analysis by ethnicity, a statistically significant correlation was detected in Australians (OR 1.60, 95%CI 1.00–2.56;  $P = 0.05$ ), Caucasians (OR 1.54, 95%CI 1.17–2.03;  $P = 0.002$ ), and Asians (OR 1.29, 95%CI 1.23–1.35;  $P < 0.00001$ ), but this association was not significant among the Arabian population (OR: 0.96, 95%CI: 0.63–1.46;  $P = 0.85$ ).

## SENSITIVITY ANALYSIS AND PUBLICATION BIAS

The funnel plot for the association between asthma and DED was symmetrical in vision (Figure 4). The Begg's test ( $z = 0.38$ ,  $P = 0.727$ ) and Egger's test ( $t = -0.40$ ,  $P = 0.708$ ) also suggested no statistically significant publication bias. A sensitivity analysis confirmed the robustness of our conclusions (detailed data not shown).

## DISCUSSION

---

To the best of our knowledge, this is the first systematic review and meta-analysis to assess the association between asthma and DED, which examined a large dataset of six studies with a total of 278079 participants. Our current findings suggest that asthma patients have a higher risk of developing DED than non-asthmatic patients, and this significant correlation could be observed in different ethnicities, except for Arabians. In the subgroup analysis of study location, Australian, Caucasian, and Asian patients with asthma showed an increased risk of DED. It cannot be ignored that dry eye questionnaires are not only useful tools for characterizing the type and severity of dry eye, but also for evaluating the effectiveness of therapeutic interventions. Therefore, in at least 50% of the observational studies included in this meta-analysis, the diagnosis of DED was based on survey instruments (questionnaires) rather than on a clinical basis.

Some population-based studies have emphasized the possible relationship between DED and asthma. Chia et al. [30] found that after adjusting for age and sex factors, asthma is a systemic factor closely related to DED. Dogru et al. [38] found that the mean measurement of tear film breakup time was significantly lower in asthma patients than in controls, and the presence of tear film instability was higher in children with asthma, which may lead to DED in the future. In addition, in terms of treatment, some studies found that patients receiving asthma-related treatments (including leukotriene

1  
2  
3 receptor antagonists, antihistamines, and inhaled corticosteroids) have a higher risk of  
4 DED, among which antihistamines were the most frequently reported. Antihistamines  
5 are widely used to relieve allergic symptoms. However, it should not be ignored  
6 that antihistamines have a muscarinic effect on the surrounding muscarinic receptors,  
7 thereby reducing the production of tears by reducing mucin output from the goblet cells  
8 [39]. Therefore, the use of antihistamines to treat allergic diseases, including asthma,  
9 induces or exacerbates the signs and symptoms of DED.[40-42] Several studies have  
10 reported that antihistamines may be associated with DED,[43-44] and Bielory [45]  
11 found that anti-inflammatory agents used in the treatment of asthma and allergy may  
12 exacerbate dry eye complaints that commonly complicate symptoms with various forms  
13 of tear film dysfunction or conjunctival hyperreactivity.  
14  
15  
16  
17  
18

19 With the emergence of many risk factors for DED, environmental conditions are  
20 associated with the occurrence and persistence of the disease. [46] One study showed  
21 that exposure to adverse environmental conditions, especially bioaerosols and air  
22 pollution, has a serious negative impact on DED symptoms.[47] This finding is largely  
23 consistent with other literature because elevated levels of air pollutants and  
24 microorganisms have been related to adverse health outcomes, including asthma and  
25 immune disorders.[48-49] Since our eyes are directly exposed to the air, the  
26 composition and characteristics of the air will undoubtedly change the anterior corneal  
27 tear film and affect the corneal nerve function.[50] Air pollution is the indicator most  
28 often associated with DED.[51-52] In addition, exposures to other pollutants have been  
29 found to be in association to symptoms and signs of DED. For example, changes in  
30 ground-level ozone concentrations are closely related to changes in DED parameters,  
31 including tear secretion and Ocular Surface Disease Index scores.[53] Both air  
32 pollutants and microbial contamination may contribute to the worsening of DED  
33 symptoms, possibly because both are associated with inflammation and oxidative stress.  
34 In animal studies, topical use of PM<sub>2.5</sub> on mouse corneas has resulted in ocular surface  
35 damage similar to that of human dry eyes.[54-55] Humidity is also an interesting risk  
36 factor, because both low and high humidity have been shown to be related to DED.[56-  
37 57] This may be because high humidity is conducive to the growth and survival of  
38 microorganisms in the air, while low humidity leads to aqueous loss.[57]  
39  
40  
41  
42  
43  
44  
45

46 Asthma is a consequence of complex gene-environment interactions and is an  
47 inflammatory response triggered by exposure to allergens, infection, or irritants.[23,  
48 58] Innate and adaptive cells, including eosinophils, mast cells, lymphocytes,  
49 neutrophils, and monocytes, are activated to express or derive cytokines and  
50 chemokines and enhance inflammation and airway hyperresponsiveness, leading to  
51 airway remodeling.[59] In contrast, the most widely accepted hypothesis for the  
52 pathogenesis of DED is the immunological mechanism [60] and inflammation.[61-62]  
53 There is potential for the ocular homeostasis to be altered by innate and adaptive cells  
54 such as neutrophils, lymphocytes, eosinophils, NK cells, and macrophages, resulting in  
55 inflammatory processes that compromise both the tear film and ocular surface  
56 integrity.[63] Although the exact mechanism of DED and asthma is not completely  
57  
58  
59  
60



1  
2  
3 clear, the pathogenesis of both diseases is closely related to inflammation, which may  
4 have some shared biological pathways.  
5

6  
7 In addition, most patients with allergic diseases, such as asthma, have allergic  
8 conjunctivitis. It is estimated that as many as 20% of adults and 44% of children with  
9 asthma have symptoms of allergic conjunctivitis.[64] Allergic conjunctivitis itself can  
10 induce or aggravate dry eye by reducing the density of goblet cells and conjunctival  
11 mucin and destabilize the tear film.[65-66] In addition, DED and allergic conjunctivitis  
12 have certain similarities in signs and symptoms.[67-68] Therefore, we cannot rule out  
13 the possibility that some allergic conjunctivitis in this population may be misdiagnosed  
14 as dry eye, and the results should be interpreted cautiously.  
15  
16

17  
18 Asthma and DED are common clinical diseases, and there is still no evidence to support  
19 a causal relationship between asthma and DED, which may have a common  
20 pathophysiological mechanism even if they occur independently. Clinicians need to  
21 diagnose the possibility of both asthma and DED. Patients with asthma should  
22 strengthen the prevention and treatment of DED and try to avoid the risk factors of DED  
23 and iatrogenic DED, including the use of contact lenses and long-term use of visual  
24 display terminals, including refractive or cataract surgery.[69-70]  
25  
26

## 27 28 LIMITATIONS

29  
30 Our analysis included an in-depth and extensive literature search that included six  
31 studies, presented data of sufficient quality, and calculated outcome measures that were  
32 independent of the risk of research bias. However, our research has some limitations in  
33 the interpretation of the results. As a general defect in the meta-analysis of  
34 observational studies, we cannot rule out the possibility that certain residual factors may  
35 link asthma and DED, such as environmental factors and the use of asthma medications.  
36 Second, due to geographic and cultural differences, the lack of universal diagnostic  
37 criteria can affect the association between asthma and the incidence of DED. Finally,  
38 the results of this study do not indicate a causal relationship between asthma and DED.  
39 We recognize that this is a limitation; thus, the results should be interpreted cautiously.  
40  
41  
42  
43

## 44 45 CONCLUSIONS

46  
47 The results of our meta-analysis show that asthma patients have a higher risk of  
48 developing DED than those without asthma, and this relationship is significant in  
49 Australians, Caucasians, and Asians. However, this association may not reflect the  
50 cause and effect if unidentified confounders account for the results. These data suggest  
51 that patients with asthma may be at risk of developing a comorbid diagnosis of DED  
52 and should try to avoid risk factors and strengthen the prevention of DED.  
53  
54  
55  
56  
57  
58  
59  
60

1  
2  
3 **Author contributions** Huang Qun and Zheng yanlin planned and designed the study.  
4 Xiao Xili and Wang Jing conducted rigorous literature searches and data extraction.  
5 Wang Wanjie, Liao Tingting and Wang Juan conducted the data preparation, quality  
6 assessments, and data analyses. Huang Qun and Zhang Chuantao wrote and revised  
7 the manuscript. All the authors read and approved the final manuscript.  
8  
9

10 **Funding** This work was supported by Sichuan Science and technology program(grant  
11 number 2020JDRC0114), "Xinglin scholar" Research Promotion Project of Chengdu  
12 University of Traditional Chinese Medicine(grant number XSGG2019016 、  
13 XGZX2003、 JSZX005), "100 Talent Plan" Project of Hospital of Chengdu University  
14 of Traditional Chinese Medicine (grant number Hospital office [2020] 42), National  
15 training program for innovative backbone talents of traditional Chinese Medicine (grant  
16 number No. 91 [2019] of the State Office of Traditional Chinese Medicine), Science  
17 and technology development fund of Hospital of Chengdu University of traditional  
18 Chinese Medicine (grant number 19LW19、 18MZ12) . The funder has provided  
19 only financial support for the study.  
20  
21  
22  
23

24 **Competing interests** None declared.  
25

26 **Patient consent for publication** Not required.  
27

28 **Provenance and peer review** Not commissioned; externally peer reviewed.  
29

30 **Data sharing statement** All data relevant to the study are included in the article or  
31 uploaded as online supplemental information. Details of the characteristics of the  
32 included studies and data extracted are available from the corresponding author at  
33 zhengyanlin@cdutcm.edu.cn.  
34  
35  
36  
37  
38  
39  
40  
41  
42  
43  
44  
45  
46  
47  
48  
49  
50  
51  
52  
53  
54  
55  
56  
57  
58  
59  
60

only

## REFERENCES

---

1. Bradley, J.L., et al., *Dry eye disease ranking among common reasons for seeking eye care in a large US claims database*. Clin Ophthalmol, 2019. **13**: p. 225-232.
2. Dana, R., et al., *Estimated Prevalence and Incidence of Dry Eye Disease Based on Coding Analysis of a Large, All-age United States Health Care System*. Am J Ophthalmol, 2019. **202**: p. 47-54.
3. Yasir, Z.H., et al., *Prevalence and Determinants of Dry Eye Disease among 40 Years and Older Population of Riyadh (Except Capital), Saudi Arabia*. Middle East Afr J Ophthalmol, 2019. **26**(1): p. 27-32.
4. Tan, L.L., et al., *Prevalence of and risk factors for symptomatic dry eye disease in Singapore*. Clin Exp Optom, 2015. **98**(1): p. 45-53.
5. Song, P., et al., *Variations of dry eye disease prevalence by age, sex and geographic characteristics in China: a systematic review and meta-analysis*. J Glob Health, 2018. **8**(2): p. 020503.
6. Caffery, B., et al., *Prevalence of dry eye disease in Ontario, Canada: A population-based survey*. Ocul Surf, 2019. **17**(3): p. 526-531.
7. Titiyal, J.S., et al., *Prevalence and risk factors of dry eye disease in North India: Ocular surface disease index-based cross-sectional hospital study*. Indian J Ophthalmol, 2018. **66**(2): p. 207-211.
8. Stapleton, F., et al., *TFOS DEWS II Epidemiology Report*. Ocul Surf, 2017. **15**(3): p. 334-365.
9. Rapoport, Y., et al., *A Comprehensive Review of Sex Disparities in Symptoms, Pathophysiology, and Epidemiology of Dry Eye Syndrome*. Semin Ophthalmol, 2016. **31**(4):

- 1  
2  
3  
4 p. 325-36.  
5  
6  
7 10. Uchino, M., *What We Know About the Epidemiology of Dry Eye Disease in Japan*. Invest  
8  
9 Ophthalmol Vis Sci, 2018. **59**(14): p. 17-23491.  
10  
11  
12 11. McDonald, M., et al., *Economic and Humanistic Burden of Dry Eye Disease in Europe,*  
13  
14 *North America, and Asia: A Systematic Literature Review*. Ocul Surf, 2016. **14**(2): p. 144-  
15  
16 67.  
17  
18  
19 12. Craig, J.P., et al., *TFOS DEWS II Definition and Classification Report*. Ocul Surf, 2017.  
20  
21 **15**(3): p. 276-283.  
22  
23  
24 13. Kim, M., et al., *Dry eye disease and allergic conditions: A Korean nationwide population-*  
25  
26 *based study*. Am J Rhinol Allergy, 2016. **30**(6): p. 397-401.  
27  
28  
29 14. GINA Executive and Science committee. Global strategy for asthma management and  
30  
31 prevention. 2020. [https://ginasthma.org/wp-content/uploads/2020/06/GINA-2020-](https://ginasthma.org/wp-content/uploads/2020/06/GINA-2020-report_20_06_04-1-wms.pdf)  
32  
33 [report\\_20\\_06\\_04-1-wms.pdf](https://ginasthma.org/wp-content/uploads/2020/06/GINA-2020-report_20_06_04-1-wms.pdf) (accessed Feb 5, 2021).  
34  
35  
36 15. To, T., et al., Global asthma prevalence in adults: findings from the cross-sectional world  
37  
38 health survey. BMC Public Health, 2012. **12**: p. 204.  
39  
40  
41 16. Ebmeier, S., et al., Trends in international asthma mortality: analysis of data from the WHO  
42  
43 Mortality Database from 46 countries (1993-2012). Lancet, 2017. **390**(10098): p. 935-945.  
44  
45  
46 17. Huang, K., et al., Prevalence, risk factors, and management of asthma in China: a national  
47  
48 cross-sectional study. Lancet, 2019. **394**(10196): p. 407-418.  
49  
50  
51 18. Holt, P.G. and P.D. Sly, Viral infections and atopy in asthma pathogenesis: new rationales  
52  
53 for asthma prevention and treatment. Nat Med, 2012. **18**(5): p. 726-35.  
54  
55  
56  
57  
58  
59  
60

19. Busse, W.W., R.F. Lemanske, Jr., and J.E. Gern, Role of viral respiratory infections in asthma and asthma exacerbations. *Lancet*, 2010. **376**(9743): p. 826-34.
20. Sbihi, H., et al., Thinking bigger: How early-life environmental exposures shape the gut microbiome and influence the development of asthma and allergic disease. *Allergy*, 2019. **9**(10): p. 13812.
21. Leiria, L.O., M.A. Martins, and M.J. Saad, Obesity and asthma: beyond T(H)2 inflammation. *Metabolism*, 2015. **64**(2): p. 172-81.
22. Hedman, L., et al., Both environmental tobacco smoke and personal smoking is related to asthma and wheeze in teenagers. *Thorax*, 2011. **66**(1): p. 20-5.
23. Papi, A., et al., Asthma. *Lancet*, 2018. 391(10122): p. 783-800.
24. Enriquez-de-Salamanca, A., S. Bonini, and M. Calonge, Molecular and cellular biomarkers in dry eye disease and ocular allergy. *Curr Opin Allergy Clin Immunol*, 2012. **12**(5): p. 523-33.
25. Chen, L., et al., High incidence of dry eye in young children with allergic conjunctivitis in Southwest China. *Acta Ophthalmol*, 2016. **94**(8): p. e727-e730.
26. Villani, E., G. Rabbio, and P. Nucci, Ocular allergy as a risk factor for dry eye in adults and children. *Curr Opin Allergy Clin Immunol*, 2018. **18**(5): p. 398-403.
27. Heck, S., et al., High probability of comorbidities in bronchial asthma in Germany. *NPJ Prim Care Respir Med*, 2017. **27**(1): p. 017-0026.
28. Masuda, S., et al., High prevalence and young onset of allergic rhinitis in children with bronchial asthma. *Pediatr Allergy Immunol*, 2008. **19**(6): p. 517-22.
29. Huang, Y.C., et al., Association between dry eye disease and asthma: a nationwide

- 1  
2  
3  
4 population-based study. PeerJ, 2018. 5(6).  
5  
6  
7 30. Chia, E.M., et al., Prevalence and associations of dry eye syndrome in an older population:  
8  
9 the Blue Mountains Eye Study. Clin Exp Ophthalmol, 2003. **31**(3): p. 229-32.  
10  
11  
12 31. Moher, D., et al., Preferred reporting items for systematic reviews and meta-analyses: the  
13  
14 PRISMA statement. PLoS Med, 2009. **6**(7): p. 21.  
15  
16  
17 32. GA Wells, B.S., D O'Connell, J Peterson, V Welch, M Losos, et al. The Newcastle-Ottawa  
18  
19 Scale (NOS) for assessing the quality of nonrandomised studies in meta-analyses.  
20  
21 Available from: [http://www.ohri.ca/programs/clinical\\_epidemiology/oxford.asp](http://www.ohri.ca/programs/clinical_epidemiology/oxford.asp).  
22  
23  
24 33. Program, T.A. Agency for Healthcare Research and Quality. Available from:  
25  
26 <http://www.ahrq.gov/research/findings/ta/index.html>.  
27  
28  
29 34. Higgins, J.P., et al., Measuring inconsistency in meta-analyses. Bmj, 2003. **327**(7414): p.  
30  
31 557-60.  
32  
33  
34 35. Wang, T.J., et al., Comorbidities of dry eye disease: a nationwide population-based study.  
35  
36 Acta Ophthalmol, 2012. **90**(7): p. 663-8.  
37  
38  
39 36. Vehof, J., et al., Prevalence and risk factors of dry eye disease in a British female cohort.  
40  
41 Br J Ophthalmol, 2014. **98**(12): p. 1712-7.  
42  
43  
44 37. Alshamrani, A.A., et al., Prevalence and Risk Factors of Dry Eye Symptoms in a Saudi  
45  
46 Arabian Population. Middle East Afr J Ophthalmol, 2017. **24**(2): p. 67-73.  
47  
48  
49 38. Dogru, M., et al., Evaluation of the tear film instability in children with allergic diseases.  
50  
51 Cutan Ocul Toxicol, 2016. **35**(1): p. 49-52.  
52  
53  
54 39. Bielory, L., Ocular toxicity of systemic asthma and allergy treatments. Curr Allergy Asthma  
55  
56 Rep, 2006. **6**(4): p. 299-305.  
57  
58  
59  
60

- 1  
2  
3  
4 40. Paulsen, A. J., et al., Dry eye in the beaver dam offspring study: Prevalence, risk factors,  
5  
6 and health-related quality of life. *Am J Ophthalmol*, 2014. **157**: p.799–806.  
7  
8  
9 41. Wong, J., et al., Non-hormonal systemic medications and dry eye. *Ocul Surf*, 2011. **9**(4):  
10  
11 P. 212-226.  
12  
13  
14 42. Ousler, G. W., et al., An evaluation of the ocular drying effects of 2 systemic antihistamines:  
15  
16 Loratadine and cetirizine hydrochloride. *Ann Allergy Asthma Immunol*, 2004. **93**(5): P. 460-  
17  
18 464.  
19  
20  
21  
22 43. Galor, A., et al., Dry eye in the beaver dam offspring study: prevalence, risk factors, and  
23  
24 health-related quality of life. *Am J Ophthalmol*, 2011. **152**(3): p.377-384.e2.  
25  
26  
27 44. Paulsen, A. J., et al., 2014.Dry eye in the beaver dam offspring study: prevalence, risk  
28  
29 factors, and health-related quality of life. *Am J Ophthalmol*, 2014. **157**(4): p. 799-806.  
30  
31  
32 45. Bielory, L., Ocular toxicity of systemic asthma and allergy treatments. *Curr Allergy Asthma*  
33  
34 *Rep*, 2006. **6**(4): p. 299-305.  
35  
36  
37 46. Galor, A., et al., Environmental factors affect the risk of dry eye syndrome in a United  
38  
39 States veteran population. *Ophthalmology*, 2014. **121**(4): P. 972-973.  
40  
41  
42 47. Idarraga, M. A., et al., Relationships Between Short-Term Exposure to an Indoor  
43  
44 Environment and Dry Eye (DE) Symptoms. *J Clin Med*, 2020. **9**(5): P. 1316.  
45  
46  
47 48. Lukcso, D., et al., Indoor environmental and air quality characteristics, building-related  
48  
49 health symptoms, and worker productivity in a federal government building complex. *Arch*  
50  
51 *Environ Occup Health*, 2016. **71**(2): P. 85-101.  
52  
53  
54 49. Fanger P. O., Indoor air quality in the 21st century: search for excellence. *Indoor Air*, 2000.  
55  
56  
57  
58  
59  
60  
10(2): P. 68-73.

- 1  
2  
3  
4 50. Wolkoff P., Ocular discomfort by environmental and personal risk factors altering the  
5  
6 precorneal tear film. *Toxicol Lett*, 2010. 199(3): P. 203-212.  
7  
8  
9 51. Mo, Z., et al., Impacts of air pollution on dry eye disease among residents in Hangzhou,  
10  
11 China: A case-crossover study. *Environ Pollut*, 2019. 246: P. 183-189.  
12  
13  
14 52. Novaes, P., et al., The effects of chronic exposure to traffic derived air pollution on the  
15  
16 ocular surface. *Environ Res*, 2010. 110(4): P. 372-374.  
17  
18  
19 53. Kim, Y., et al., Short-Term Effects of Ground-Level Ozone in Patients With Dry Eye  
20  
21 Disease: A Prospective Clinical Study. *Cornea*, 2019. 38(12): P. 1483-1488.  
22  
23  
24 54. Yang, Q., et al., Effects of fine particulate matter on the ocular surface: An in vitro and in  
25  
26 vivo study. *Biomed Pharmacother*, 2019. 117: P. 109177.  
27  
28  
29 55. Tan, G., et al., Air pollutant particulate matter 2.5 induces dry eye syndrome in mice. *Sci*  
30  
31 *Rep*, 2018. 8(1): P. 17828.  
32  
33  
34 56. Wolkoff P., Indoor air humidity, air quality, and health - An overview. *Int J Hyg Environ*  
35  
36 *Health*, 2018. 221(3): P. 376-390.  
37  
38  
39 57. Wolkoff, P., The dichotomy of relative humidity on indoor air quality. *Environ Int*, 2007.  
40  
41 33(6): P. 850-857.  
42  
43  
44 58. Gibson, P.G. and V.M. McDonald, Management of severe asthma: targeting the airways,  
45  
46 comorbidities and risk factors. *Intern Med J*, 2017. 47(6): p. 623-631.  
47  
48  
49 59. Guida, G. and A.M. Riccio, Immune induction of airway remodeling. *Semin Immunol*, 2019.  
50  
51 14(101346): p. 101346.  
52  
53  
54 60. Barabino, S., et al., Ocular surface immunity: homeostatic mechanisms and their disruption  
55  
56 in dry eye disease. *Prog Retin Eye Res*, 2012. 31(3): p. 271-85.  
57  
58  
59  
60



- 1  
2  
3  
4 61. Wei, Y. and P.A. Asbell, The core mechanism of dry eye disease is inflammation. *Eye*  
5  
6  
7 Contact Lens, 2014. 40(4): p. 248-56.  
8  
9 62. Yamaguchi, T., Inflammatory Response in Dry Eye. *Invest Ophthalmol Vis Sci*, 2018.  
10  
11 59(14): p. 17-23651.  
12  
13  
14 63. Reyes, J.L., et al., Innate and Adaptive Cell Populations Driving Inflammation in Dry Eye  
15  
16 Disease. *Mediators Inflamm*, 2018. 12(2532314).  
17  
18  
19 64. Neto, H. J., et al., Allergic conjunctivitis in asthmatic children: as common as underreported.  
20  
21  
22 Ann Allergy Asthma Immunol, 2010. 105: p. 399-400.  
23  
24  
25 65. Onguchi, T., et al., The impact of the onset time of atopic keratoconjunctivitis on the tear  
26  
27 function and ocular surface findings. *Am J Ophthalmol*, 2006. 141: p. 569-571.  
28  
29  
30 66. Hu, Y., et al., The differences of tear function and ocular surface findings in patients with  
31  
32 atopic keratoconjunctivitis and vernal keratoconjunctivitis. *Allergy*, 2007. 62: p. 917-925.  
33  
34  
35 67. Baudouin, C., Formes frontières de l'allergie [Conditions bordering on allergy]. *J Fr*  
36  
37 *Ophthalmol*, 2007. 30: p.306-313.  
38  
39  
40 68. Hom, M. M., et al., Allergic conjunctivitis and dry eye syndrome. *Ann Allergy Asthma*  
41  
42 *Immunol*, 2012.108: p.163-166.  
43  
44  
45 69. Uchino, M., et al., Prevalence and risk factors of dry eye disease in Japan: Koumi study.  
46  
47  
48 *Ophthalmology*, 2011. 118(12): p. 2361-7.  
49  
50  
51 70. Gomes, J.A.P., et al., TFOS DEWS II iatrogenic report. *Ocul Surf*, 2017. 15(3): p. 511-538.  
52  
53  
54  
55  
56  
57  
58  
59  
60

## Figure Legends

---

Figure 1. Flow chart of literature search.

Figure 2. Meta-analysis of asthma and DED using a random-effects model.

Figure 3. Subgroup analysis by ethnicity of asthma and DED.

Figure 4. Funnel plot of a meta-analysis of asthma and DED.

For peer review only

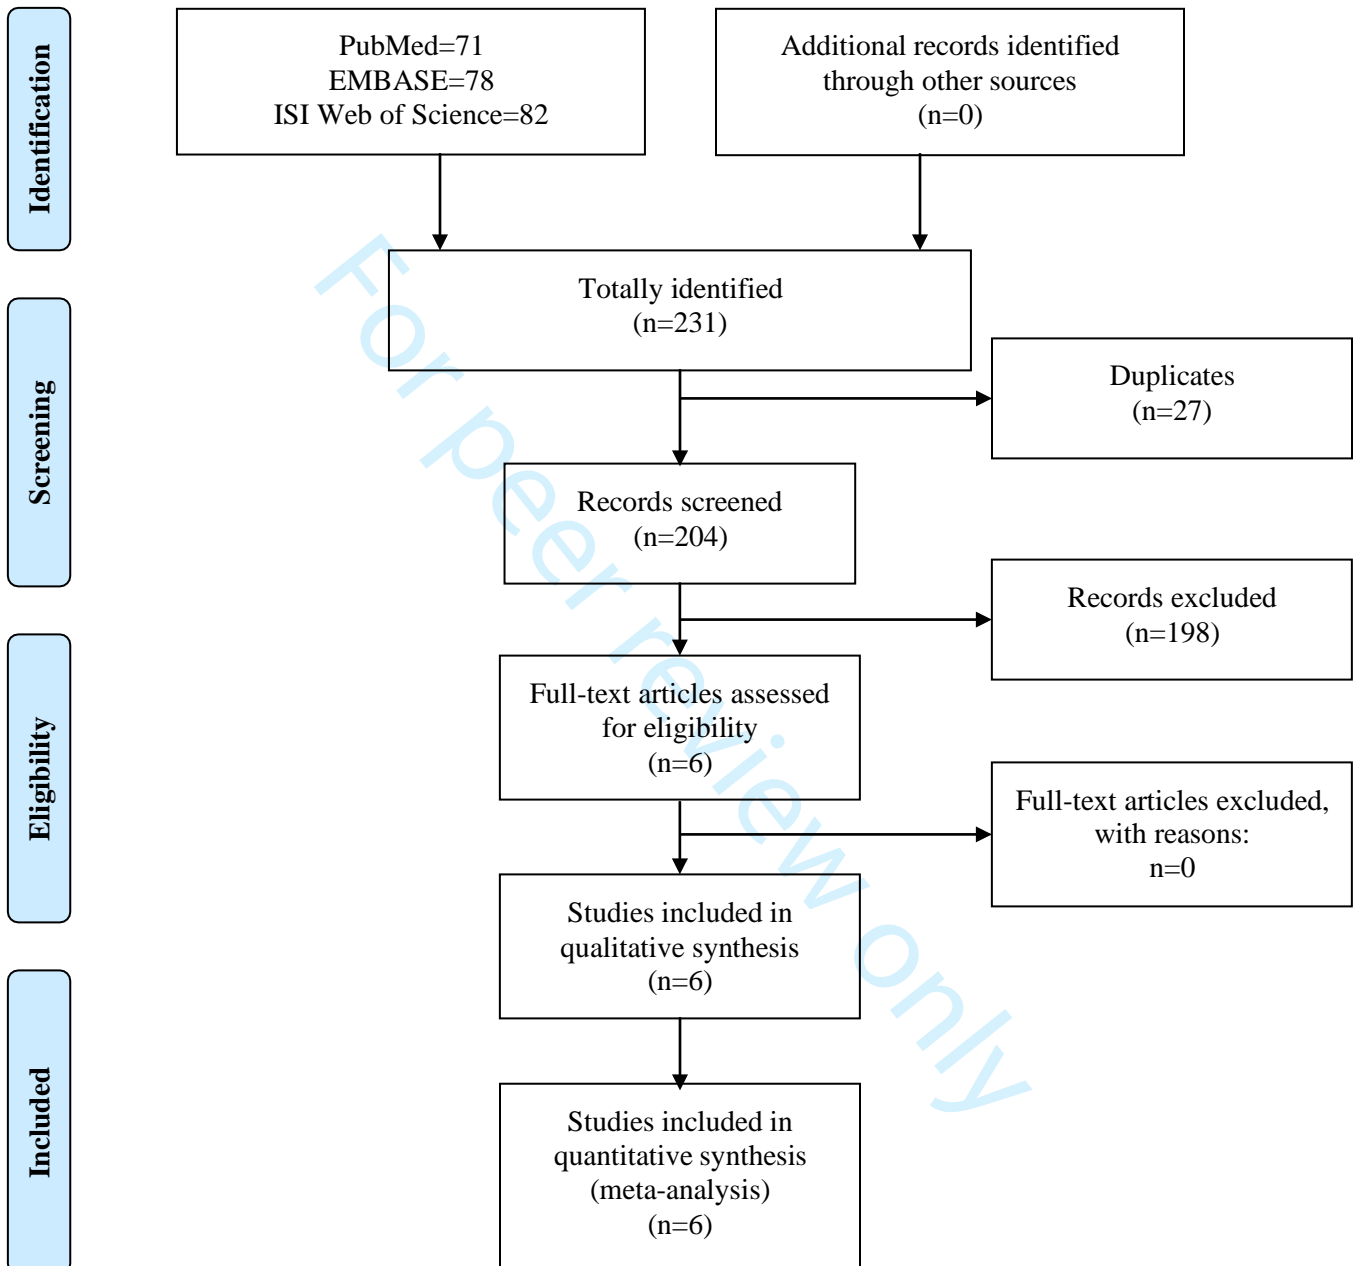

1  
2  
3  
4  
5  
6  
7  
8  
9  
10  
11  
12  
13  
14  
15  
16  
17  
18  
19  
20  
21  
22  
23  
24  
25  
26  
27  
28  
29  
30  
31  
32  
33  
34  
35  
36  
37  
38  
39  
40  
41  
42  
43  
44  
45  
46  
47  
48  
49  
50  
51  
52  
53  
54  
55  
56  
57  
58  
59  
60

For peer review only

only

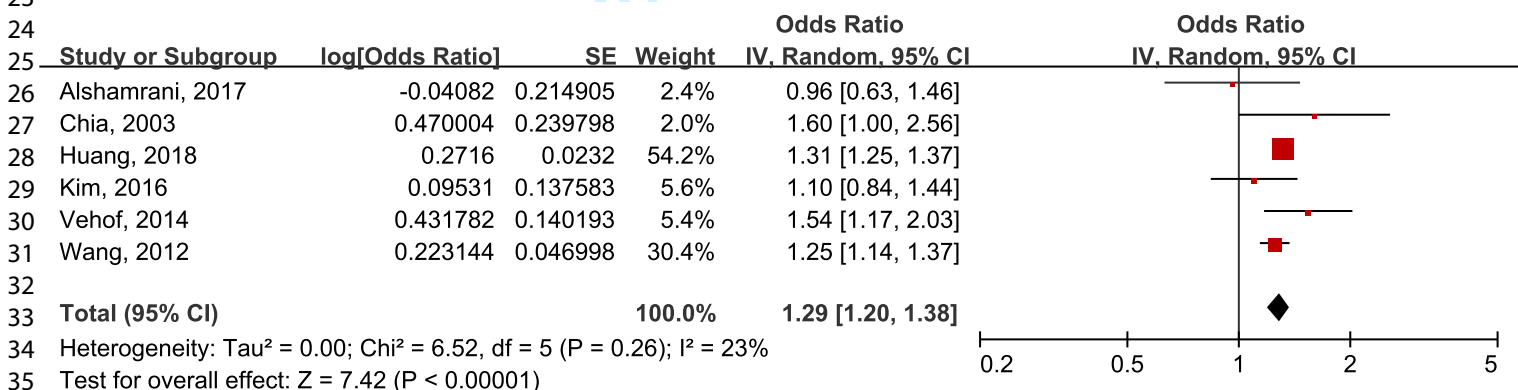

1  
2  
3  
4  
5  
6  
7  
8  
9  
10  
11  
12  
13  
14  
15  
16  
17  
18  
19  
20  
21  
22  
23  
24  
25  
26  
27  
28  
29  
30  
31  
32  
33  
34  
35  
36  
37  
38  
39  
40  
41  
42  
43  
44  
45  
46  
47  
48  
49  
50  
51  
52  
53  
54  
55  
56  
57  
58  
59  
60

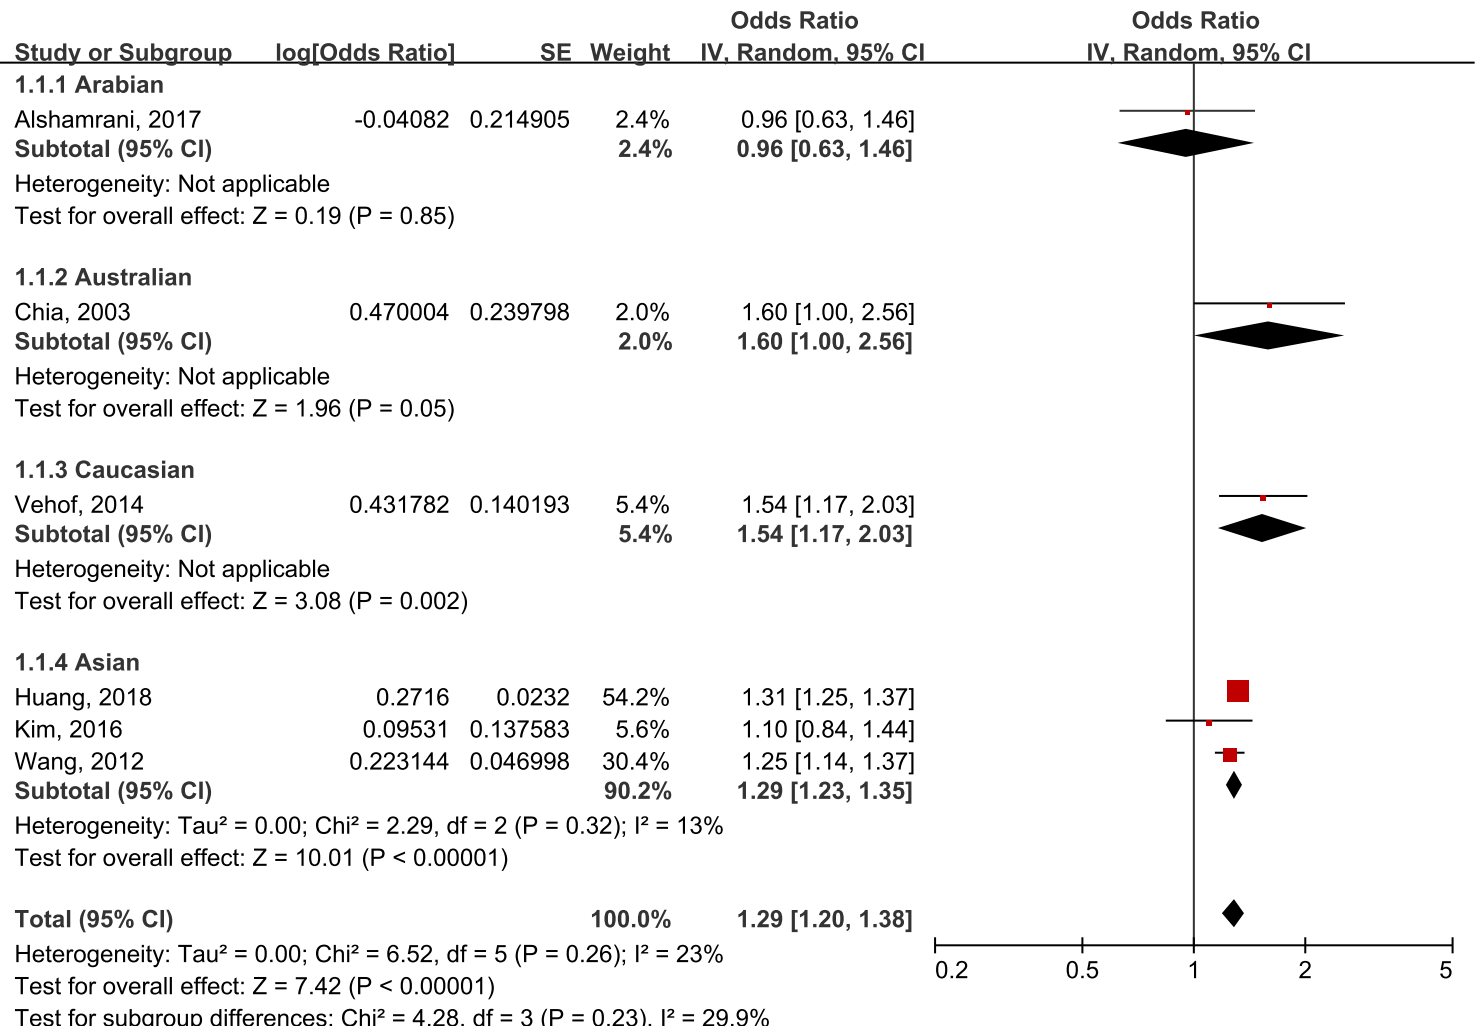

1  
2  
3  
4  
5  
6  
7  
8  
9  
10  
11  
12  
13  
14  
15  
16  
17  
18  
19  
20  
21  
22  
23  
24  
25  
26  
27  
28  
29  
30  
31  
32  
33  
34  
35  
36  
37  
38  
39  
40  
41  
42  
43  
44  
45  
46  
47  
48  
49  
50  
51  
52  
53  
54  
55  
56  
57  
58  
59  
60

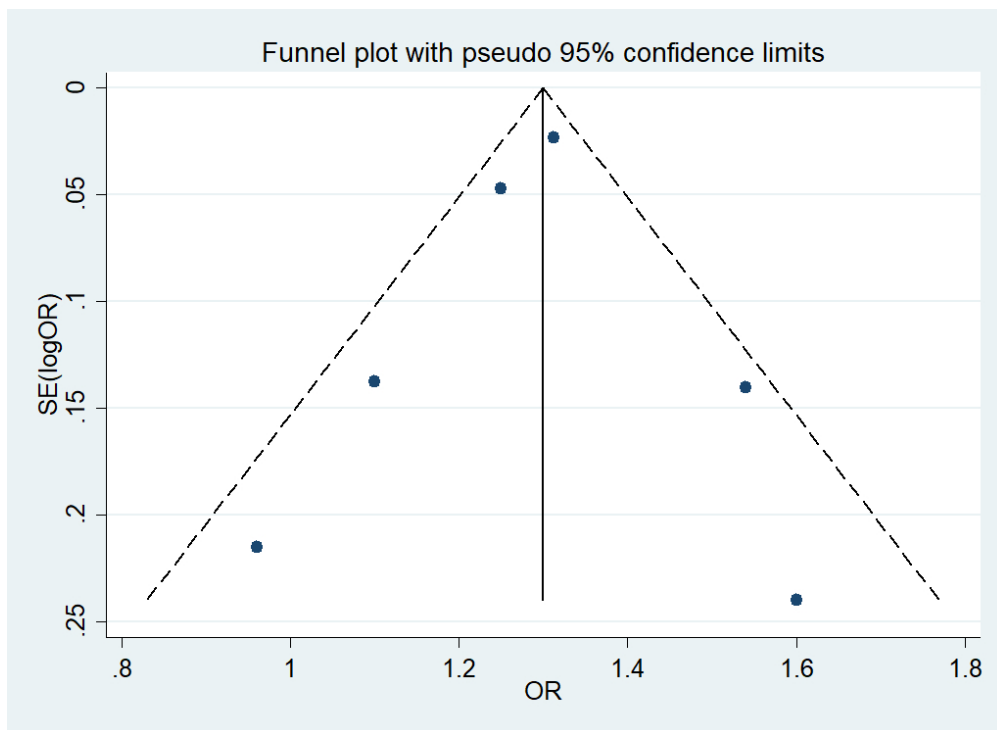

Funnel plot of a meta-analysis of asthma and DED

360x261mm (72 x 72 DPI)

# BMJ Open

## Association between asthma and dry eye disease: A meta-analysis based on observational studies

|                                 |                                                                                                                                                                                                                                                                                                                                                                                                                                                                                                                                                                                                                                                                                                                                                                                                                                                                             |
|---------------------------------|-----------------------------------------------------------------------------------------------------------------------------------------------------------------------------------------------------------------------------------------------------------------------------------------------------------------------------------------------------------------------------------------------------------------------------------------------------------------------------------------------------------------------------------------------------------------------------------------------------------------------------------------------------------------------------------------------------------------------------------------------------------------------------------------------------------------------------------------------------------------------------|
| Journal:                        | <i>BMJ Open</i>                                                                                                                                                                                                                                                                                                                                                                                                                                                                                                                                                                                                                                                                                                                                                                                                                                                             |
| Manuscript ID                   | bmjopen-2020-045275.R2                                                                                                                                                                                                                                                                                                                                                                                                                                                                                                                                                                                                                                                                                                                                                                                                                                                      |
| Article Type:                   | Original research                                                                                                                                                                                                                                                                                                                                                                                                                                                                                                                                                                                                                                                                                                                                                                                                                                                           |
| Date Submitted by the Author:   | 29-Sep-2021                                                                                                                                                                                                                                                                                                                                                                                                                                                                                                                                                                                                                                                                                                                                                                                                                                                                 |
| Complete List of Authors:       | <p>huang, qun; Chengdu University of Traditional Chinese Medicine Affiliated Hospital, Ophthalmology; Chengdu University of TCM</p> <p>Zheng, Yanlin; Chengdu University of Traditional Chinese Medicine Affiliated Hospital, Ophthalmology; Chengdu University of Traditional Chinese Medicine,</p> <p>zhang, chuantao; Chengdu University of Traditional Chinese Medicine Affiliated Hospital</p> <p>wang, wanjie; Chengdu University of Traditional Chinese Medicine Affiliated Hospital</p> <p>liao, tingting; Chengdu University of Traditional Chinese Medicine Affiliated Hospital</p> <p>xiao, xili; Chengdu University of Traditional Chinese Medicine Affiliated Hospital</p> <p>wang, jing; Chengdu University of Traditional Chinese Medicine Affiliated Hospital</p> <p>wang, juan; Chengdu University of Traditional Chinese Medicine Affiliated Hospital</p> |
| <b>Primary Subject Heading</b>: | Evidence based practice                                                                                                                                                                                                                                                                                                                                                                                                                                                                                                                                                                                                                                                                                                                                                                                                                                                     |
| Secondary Subject Heading:      | Ophthalmology                                                                                                                                                                                                                                                                                                                                                                                                                                                                                                                                                                                                                                                                                                                                                                                                                                                               |
| Keywords:                       | Medical ophthalmology < OPHTHALMOLOGY, Asthma < THORACIC MEDICINE, Paediatric ophthalmology < OPHTHALMOLOGY, Orbital and lacrimal disorders < OPHTHALMOLOGY                                                                                                                                                                                                                                                                                                                                                                                                                                                                                                                                                                                                                                                                                                                 |
|                                 |                                                                                                                                                                                                                                                                                                                                                                                                                                                                                                                                                                                                                                                                                                                                                                                                                                                                             |

SCHOLARONE™  
Manuscripts



I, the Submitting Author has the right to grant and does grant on behalf of all authors of the Work (as defined in the below author licence), an exclusive licence and/or a non-exclusive licence for contributions from authors who are: i) UK Crown employees; ii) where BMJ has agreed a CC-BY licence shall apply, and/or iii) in accordance with the terms applicable for US Federal Government officers or employees acting as part of their official duties; on a worldwide, perpetual, irrevocable, royalty-free basis to BMJ Publishing Group Ltd ("BMJ") its licensees and where the relevant Journal is co-owned by BMJ to the co-owners of the Journal, to publish the Work in this journal and any other BMJ products and to exploit all rights, as set out in our [licence](#).

The Submitting Author accepts and understands that any supply made under these terms is made by BMJ to the Submitting Author unless you are acting as an employee on behalf of your employer or a postgraduate student of an affiliated institution which is paying any applicable article publishing charge ("APC") for Open Access articles. Where the Submitting Author wishes to make the Work available on an Open Access basis (and intends to pay the relevant APC), the terms of reuse of such Open Access shall be governed by a Creative Commons licence – details of these licences and which [Creative Commons](#) licence will apply to this Work are set out in our licence referred to above.

Other than as permitted in any relevant BMJ Author's Self Archiving Policies, I confirm this Work has not been accepted for publication elsewhere, is not being considered for publication elsewhere and does not duplicate material already published. I confirm all authors consent to publication of this Work and authorise the granting of this licence.



# Association between asthma and dry eye disease: A meta-analysis based on observational studies

## Running title: asthma and DED

Huang Qun<sup>1\*</sup>, M.M., Zheng Yanlin<sup>2†</sup>, M.M., Zhang Chuantao<sup>3</sup>, M.D., Wang Wanjie<sup>1</sup>, M.M., Liao Tingting<sup>4</sup>, Xiao Xili<sup>1</sup>, M.M., Wang Jing<sup>1</sup>, M.M., Wang Juan<sup>1</sup>, M.B

1 Department of Ophthalmology, Hospital of Chengdu University of Traditional Chinese Medicine, Chengdu, China.

2 Clinical Medical College, Chengdu University of Traditional Chinese Medicine, Chengdu, China.

3 Department of Respiratory Medicine, Hospital of Chengdu University of Traditional Chinese Medicine, Chengdu, China.

4. Department of endocrinology, Hospital of Chengdu University of Traditional Chinese Medicine, Chengdu, China.

\* first author, E-mail: skirth@163.com

† Corresponding author, E-mail: zhengyanlin@cdutcm.edu.cn

**Abbreviations:** DED, dry eye disease; PRISMA, Preferred Reporting Items for Systematic Review and Meta-Analyses; MeSH, Medical Subject Headings; OR, odds ratio; NOS, Newcastle-Ottawa Scale;

## ABSTRACT

---

### Objective

This study aimed to systematically review the relationship between DED and asthma based on published population-based studies.

### Data sources

PubMed, EMBASE, and ISI Web of Science from their inception were searched up to October 2019.

### Study selection

Observational studies addressing the association between asthma and DED will be eligible.

### Data extraction and synthesis

Two reviewers independently conducted the data extraction and quality assessment. We used a random effects model for all analyses. Subgroup analysis according to ethnicity was performed to test the influence of ethnicity on the association.

### Main outcomes and measures

Six independent studies (a total of 45215 patients with asthma and 232864 control subjects) were included in this review and had an average of seven stars by the Newcastle-Ottawa Scale. Our current findings suggest that the prevalence of DED was higher in the asthma group than in the control group ( $Z = 7.42$ ,  $P < 0.00001$ ; OR 1.29, 95% CI 1.20–1.38). In the subgroup analysis by ethnicity, Australian, Caucasian, and Asian patients with asthma showed an increased risk of DED.

**OSF registration number** DOI 10.17605/OSF.IO/UHN38).

### Keywords

---

Dry eye disease; asthma; meta-analysis

## Strengths and Limitations

---

To the best of our knowledge, this is the first systematic review and meta-analysis to assess the association between asthma and DED.

Six included studies achieved an average of 7 stars, and two studies gained nine stars according to the NOS.

Due to geographic and cultural differences, the lack of universal diagnostic criteria can affect the association between asthma and the incidence of DED.

This significant association may not reflect a causal effect due to the cross-sectional design of the included studies.

## INTRODUCTION

---

Dry eye disease (DED) has been the focus of attention in recent years, as it is one of the main reasons for seeking eye care in eye clinics.[1] According to surveys, the prevalence of DED is estimated to be between 5% and 50%.[2-8] the frequency of which increases with age.[9] The prevalence is driven mainly by the classification of DED, with the prevalence of signs being much higher (up to 75%) compared to symptoms.[8] The economic burden and impact of DED is considerable in terms of vision, quality of life, work productivity, and the psychological and physical impact of pain. Therefore, indirect costs account for the largest proportion of total costs because of the significant decline in work efficiency.[8, 10, 11]

DED is considered to be a multifactorial disease of the ocular surface characterized by a loss of homeostasis of the tear film accompanied by ocular symptoms, in which tear film instability and hyperosmolarity, ocular surface inflammation and damage, and neurosensory abnormalities play etiological roles.[12] Clear factors currently known to be associated with the onset of DED include age, sex, and hormones, but in recent years, it has also been found that DED is associated with asthma, allergic rhinitis, and atopic dermatitis.[13]

Asthma is one of the most common chronic immunological diseases in humans, affecting 1%–18% of the population in different countries.[14] Specifically, the prevalence of asthma varies depending on whether the disease is diagnosed by a medical doctor (4.3%), clinical/treated asthma (4.5%), or symptoms such as wheezing (8.6%), and varies by up to 21 times in different countries.[15] Its mortality rate is estimated to 0.19 deaths per 100,000 people.[16-17] The etiology of asthma is multifactorial, including atopic sensitization,[18] viral respiratory infections,[19] environmental exposures,[20] obesity,[21] and smoking [22]. Asthma is considered to be the result of complex genetic-environmental interactions, with heterogeneity in the clinical manifestations and the type and intensity of airway inflammation and remodeling.[23]

Increasing evidence suggests that DED is associated with a high risk of ocular allergy. [24-25] Ocular allergy, particularly the severe forms of keratoconjunctivitis, has an impact on different key mechanisms of DED, including tear film instability, ocular surface inflammation and damage, and neurosensory abnormalities.[26] Moreover, patients with asthma also often have allergic comorbidities such as allergic rhinitis, allergic conjunctivitis, atopic dermatitis, food allergy, and drug allergy.[27-28] Recently, several studies have highlighted the possible relationship between DED and asthma.[29-30] However, a possible relationship between asthma and DED remains under investigation, and well-established information is very limited. To the best of our knowledge, no meta-analysis has been performed to assess the relationship between asthma and DED. Thus, we performed the current meta-analysis to determine whether there is a link between asthma and DED using a meta-analytic approach to quantify such associations.

## METHODS

---

This systematic review and meta-analysis conformed to the Preferred Reporting Items for Systematic Review and Meta-Analyses (PRISMA) guidelines.[31]

### ETHICAL APPROVAL

Ethical approval, informed consent, and patient and public involvement statements were not necessary because all the data used for the analyses were extracted from available publications. The meta-analysis has been registered in the Open Science Framework (registration number: DOI 10.17605/OSF.IO/UHN38).

### LITERATURE SEARCH STRATEGY

Referring to the search strategy suggested by Cochrane, two researchers independently and systematically searched three electronic databases, including PubMed, EMBASE, and ISI Web of Science, from the database inception date until October 1, 2019, without language restrictions. A combination of Medical Subject Terms (MeSHs) and free terms was used to retrieve possibly eligible publications in each electronic database, and the English search strategy was as follows: (asthma or “Asthma”[MeSH]) and (dry eye or dry eye disease or “dry eye syndrome” [MeSH]). For Chinese academic databanks, we used “gan yan” and “xiao chuan” to identify relevant Chinese articles. We also manually screened the reference lists of the original and review articles for additional eligible studies.

### INCLUSION CRITERIA

The inclusion criteria were as follows: (i) the diagnosis of asthma and DED in the study group was based on well-established criteria or according to a clinical diagnosis made by clinical physicians; (ii) control subjects should be free of any history of asthma or DED, no specific restriction on sex and age was imposed; (iii) types of study were observational studies, including cross-sectional, cohort, case-control, or epidemiological studies; (iv) the main outcome was the association between DED and asthma, as indicated by odds ratio (OR) and the associated 95% confidence intervals (CI), which should be either provided directly in the original article or could be calculated based on the original data. If studies with overlapping participants were encountered, reports with the largest sample and the most recent reports were included in the present meta-analysis. If no data was available in the original article, the corresponding author of the relevant study was contacted via email. If the corresponding author did not respond after we sent three e-mails, this article was not used for quantitative synthesis. Abstracts, editorial letters, reviews, case reports, book chapters, and organizational guidelines were excluded from the analysis.

### DATA EXTRACTION

According to the predetermined inclusion criteria, two reviewers (XXL and WJ) independently conducted the literature search, data extraction, and quality assessment

1  
2  
3 and were blinded to the findings of the other reviewer. After rigorous screening, the  
4 following data regarding the characteristics of the studies were extracted using a  
5 standardized collection form: first author, year of publication, country where the study  
6 was conducted, sample size, demographic characteristics of participants in different  
7 groups, strategies for confirmation of DED and asthma, and adjustment of confounding  
8 factors for effect assessment. Disagreements that occurred during the study selection  
9 were resolved through a discussion with a third reviewer (ZYL) until a consensus was  
10 reached.  
11  
12  
13

## 14 15 QUALITY ASSESSMENT

16  
17 The Newcastle-Ottawa Scale (NOS) was used to assess the risk of bias in case-control  
18 and cohort studies.[32] The methodological quality of the cross-sectional studies was  
19 evaluated according to the standards of the Agency for Healthcare Research and  
20 Quality.[33] Two reviewers (WWJ and WJ) independently conducted quality  
21 assessments of the included studies and compared the results. The third reviewer (ZYL)  
22 was consulted in case of discrepancies regarding quality assessment.  
23  
24  
25

## 26 27 DATA SYNTHESIS AND ANALYSIS

28  
29 RevMan 5.3 (Copenhagen: the Nordic Cochrane Center, the Cochrane Collaboration,  
30 2014) was used for the meta-analysis and subgroup analysis. The association between  
31 asthma and DED was estimated using adjusted OR and unadjusted OR, and the upper  
32 and lower limits of the 95%CI were extracted from each study. The confounding factors  
33 included age and sex. Before combining the data from the included studies, statistical  
34 heterogeneity among studies for each outcome was estimated using a standard Chi-  
35 square test and the Higgins  $I^2$  test ( $P>0.1$ ,  $I^2<50\%$  indicated acceptable heterogeneity  
36 [34]). In the meta-analyses of multiple studies for a specific outcome, a random-effect  
37 estimate was calculated for pooling data across studies if statistical heterogeneity  
38 existed; however, if a low heterogeneity was detected in the meta-analysis, a random-  
39 effect estimate was also calculated, as the validity of tests of heterogeneity could be  
40 limited with a small number of component studies. In the case of high heterogeneity,  
41 subgroup analysis was carried out by ethnicity, as it was the only confounding factor  
42 consistently presented in our selected studies. Sensitivity analysis was conducted by  
43 omitting one study at a time and evaluating the resulting effect to determine the  
44 potential source of heterogeneity. Begg's rank correlation test and Egger's linear  
45 regression test using Stata version 12.0 (Stata Corp LP, USA) were used to evaluate  
46 publication bias. Statistical significance was set at  $P<0.05$  (1-sided), except for tests  
47 of heterogeneity.  
48  
49  
50  
51  
52  
53

## 54 55 PATIENT AND PUBLIC INVOLVEMENT

56  
57 There was no involvement of patients or public during the outline of this project.  
58  
59  
60

## RESULTS

---

### LITERATURE SEARCH

A total of 231 potential literature citations were searched initially, including 71 records from PubMed, 78 from EMBASE, and 82 from ISI Web of Science (Figure 1). Additionally, 27 duplicate articles were excluded. Based on the predetermined selection criteria, 198 studies were excluded at the title and abstract stages, and six potentially relevant studies were selected and retrieved for full-text reading and evaluation of data integrity. Finally, six studies [13, 29, 30, 35-37] met all the inclusion criteria for this systematic review and were included.

### STUDY CHARACTERISTICS

Overall, the sample sizes of the included studies ranged from 1174 to 105794, of which a total of 45215 patients with asthma and 232864 control subjects were included. The included studies were published between 2003 and 2018 and involved different ethnicities, including Arabian, Australian, Asian, and Caucasian populations. The assessment of asthma and DED was inconsistent between studies, and detailed data on the main characteristics of these studies are shown in Table 1.

### RISK OF BIAS ASSESSMENT

The methodological quality of the included studies was considered low to high, according to the NOS. Six included studies achieved an average of seven stars, and two studies [29, 35] gained nine stars (Table 2).

Table 1. Main characteristics of included studies.

| Study            | Country      | Ethnicity  | Study design    | Sample size                      | Mean age | Definition of asthma                   | Definition of DED                      | Adjustment for confounders                                                            |
|------------------|--------------|------------|-----------------|----------------------------------|----------|----------------------------------------|----------------------------------------|---------------------------------------------------------------------------------------|
| Alshamrani, 2017 | Saudi Arabia | Arabian    | Cross-sectional | Asthma: 139<br>Control: 1719     | 39.3     | Questionnaire                          | Six-item questionnaire                 | Age, gender and smoking                                                               |
| Chia, 2003       | Australia    | Australian | Cross-sectional | Asthma: 135<br>Control: 1039     | 60.8     | Medical history of confirmed diagnosis | Interviewer-administered questionnaire | Age and gender                                                                        |
| Huang, 2018      | Taiwan       | Asian      | Cohort          | Asthma: 41229<br>Control: 164916 | 49.56    | ICD-9-CM 493                           | ICD-9-CM 375.15                        | Age and gender                                                                        |
| Kim, 2016        | Korea        | Asian      | Cross-sectional | Asthma: 556<br>Control: 16494    | 50.88    | Medical history                        | Interviewer-administered questionnaire | Age, gender, residential area, education level, occupation and history of eye surgery |
| Vehof, 2014      | UK           | Caucasian  | Cross-sectional | Asthma: 608<br>Control: 3216     | 57.1     | Medical history                        | ICD-9-CM 375.15                        | Age and gender                                                                        |
| Wang, 2012       | Taiwan       | Asian      | Cross-sectional | Asthma: 2548<br>Control: 45480   | 52.4     | Elixhauser comorbidity index           | ICD-9-CM 375.15                        | Age, gender, urbanization levels and monthly incomes                                  |

DED: dry eye diseases



Table 2. Quality assessment of included studies according to the Newcastle-Ottawa Scale.

| Item/Study                                        | Alshamrani,<br>2017 | Chia,<br>2003 | Huang,<br>2018 | Kim,<br>2016 | Vehof,<br>2014 | Wang,<br>2012 |
|---------------------------------------------------|---------------------|---------------|----------------|--------------|----------------|---------------|
| Adequate definition of cases                      | *                   | *             | *              | *            | *              | *             |
| Representativeness of cases                       | *                   | -             | *              | *            | -              | *             |
| Selection of control subjects                     | -                   | -             | *              | *            | -              | *             |
| Definition of control subjects                    | *                   | *             | *              | *            | *              | *             |
| Control for important factor or additional factor | -                   | -             | **             | -            | *              | **            |
| Exposure assessment                               | *                   | *             | *              | *            | *              | *             |
| Same method of ascertainment for all subjects     | *                   | *             | *              | *            | *              | *             |
| Non-response rate                                 | *                   | *             | *              | *            | *              | *             |

A study could be awarded a maximum of one star for each item except for the item "Control for important factor or additional factor".

The definition/explanation of each column of the Newcastle-Ottawa Scale is available from

([http://www.ohri.ca/programs/clinical\\_epidemiology/oxford.asp](http://www.ohri.ca/programs/clinical_epidemiology/oxford.asp)).

## META-ANALYSES

A random effects model was selected to analyze the effect size with modest heterogeneity among the studies ( $I^2 = 23\%$ ,  $P = 0.26$ ). The asthma group had a significantly higher prevalence of DED than the control group (OR 1.29, 95%CI 1.20–1.38;  $P < 0.00001$ ). In brief, there was a significant association between asthma and DED (Figure 2). Owing to the lack of data, it was not possible to detect an association between asthma and diverse subtypes of DED.

## SUBGROUP ANALYSIS AND SENSITIVITY ANALYSIS

Subgroup analysis was performed according to ethnicity (Figure 3). In the stratified analysis by ethnicity, a statistically significant correlation was detected in Australians (OR 1.60, 95%CI 1.00–2.56;  $P = 0.05$ ), Caucasians (OR 1.54, 95%CI 1.17–2.03;  $P = 0.002$ ), and Asians (OR 1.29, 95%CI 1.23–1.35;  $P < 0.00001$ ), but this association was not significant among the Arabian population (OR: 0.96, 95%CI: 0.63–1.46;  $P = 0.85$ ).

## SENSITIVITY ANALYSIS AND PUBLICATION BIAS

The funnel plot for the association between asthma and DED was symmetrical in vision (Figure 4). The Begg's test ( $z = 0.38$ ,  $P = 0.727$ ) and Egger's test ( $t = -0.40$ ,  $P = 0.708$ ) also suggested no statistically significant publication bias. A sensitivity analysis confirmed the robustness of our conclusions (detailed data not shown).

## DISCUSSION

---

To the best of our knowledge, this is the first systematic review and meta-analysis to assess the association between asthma and DED, which examined a large dataset of six studies with a total of 278079 participants. Our current findings suggest that asthma patients have a higher risk of developing DED than non-asthmatic patients, and this significant correlation could be observed in different ethnicities, except for Arabians. In the subgroup analysis of study location, Australian, Caucasian, and Asian patients with asthma showed an increased risk of DED. It cannot be ignored that dry eye questionnaires are not only useful tools for characterizing the type and severity of dry eye, but also for evaluating the effectiveness of therapeutic interventions. Therefore, in at least 50% of the observational studies included in this meta-analysis, the diagnosis of DED was based on survey instruments (questionnaires) rather than on a clinical basis.

Some population-based studies have emphasized the possible relationship between DED and asthma. Chia et al. [30] found that after adjusting for age and sex factors, asthma is a systemic factor closely related to DED. Dogru et al. [38] found that the mean measurement of tear film breakup time was significantly lower in asthma patients than in controls, and the presence of tear film instability was higher in children with asthma, which may lead to DED in the future. In addition, in terms of treatment, some studies found that patients receiving asthma-related treatments (including leukotriene

1  
2  
3 receptor antagonists, antihistamines, and inhaled corticosteroids) have a higher risk of  
4 DED, among which antihistamines were the most frequently reported. Antihistamines  
5 are widely used to relieve allergic symptoms. However, it should not be ignored  
6 that antihistamines have a muscarinic effect on the surrounding muscarinic receptors,  
7 thereby reducing the production of tears by reducing mucin output from the goblet cells  
8 [39]. Therefore, the use of antihistamines to treat allergic diseases, including asthma,  
9 induces or exacerbates the signs and symptoms of DED.[40-42] Several studies have  
10 reported that antihistamines may be associated with DED,[43-44] and Bielory [45]  
11 found that anti-inflammatory agents used in the treatment of asthma and allergy may  
12 exacerbate dry eye complaints that commonly complicate symptoms with various forms  
13 of tear film dysfunction or conjunctival hyperreactivity.  
14  
15  
16  
17  
18

19 With the emergence of many risk factors for DED, environmental conditions are  
20 associated with the occurrence and persistence of the disease. [46] One study showed  
21 that exposure to adverse environmental conditions, especially bioaerosols and air  
22 pollution, has a serious negative impact on DED symptoms.[47] This finding is largely  
23 consistent with other literature because elevated levels of air pollutants and  
24 microorganisms have been related to adverse health outcomes, including asthma and  
25 immune disorders.[48-49] Since our eyes are directly exposed to the air, the  
26 composition and characteristics of the air will undoubtedly change the anterior corneal  
27 tear film and affect the corneal nerve function.[50] Air pollution is the indicator most  
28 often associated with DED.[51-52] In addition, exposures to other pollutants have been  
29 found to be in association to symptoms and signs of DED. For example, changes in  
30 ground-level ozone concentrations are closely related to changes in DED parameters,  
31 including tear secretion and Ocular Surface Disease Index scores.[53] Both air  
32 pollutants and microbial contamination may contribute to the worsening of DED  
33 symptoms, possibly because both are associated with inflammation and oxidative stress.  
34 In animal studies, topical use of PM2.5 on mouse corneas has resulted in ocular surface  
35 damage similar to that of human dry eyes.[54-55] Humidity is also an interesting risk  
36 factor, because both low and high humidity have been shown to be related to DED.[56-  
37 57] This may be because high humidity is conducive to the growth and survival of  
38 microorganisms in the air, while low humidity leads to aqueous loss.[57]  
39  
40  
41  
42  
43  
44  
45

46 Asthma is a consequence of complex gene-environment interactions and is an  
47 inflammatory response triggered by exposure to allergens, infection, or irritants.[23,  
48 58] Innate and adaptive cells, including eosinophils, mast cells, lymphocytes,  
49 neutrophils, and monocytes, are activated to express or derive cytokines and  
50 chemokines and enhance inflammation and airway hyperresponsiveness, leading to  
51 airway remodeling.[59] In contrast, the most widely accepted hypothesis for the  
52 pathogenesis of DED is the immunological mechanism [60] and inflammation.[61-62]  
53 There is potential for the ocular homeostasis to be altered by innate and adaptive cells  
54 such as neutrophils, lymphocytes, eosinophils, NK cells, and macrophages, resulting in  
55 inflammatory processes that compromise both the tear film and ocular surface  
56 integrity.[63] Although the exact mechanism of DED and asthma is not completely  
57  
58  
59  
60

1  
2  
3 clear, the pathogenesis of both diseases is closely related to inflammation, which may  
4 have some shared biological pathways.  
5

6  
7 In addition, most patients with allergic diseases, such as asthma, have allergic  
8 conjunctivitis. It is estimated that as many as 20% of adults and 44% of children with  
9 asthma have symptoms of allergic conjunctivitis.[64] Allergic conjunctivitis itself can  
10 induce or aggravate dry eye by reducing the density of goblet cells and conjunctival  
11 mucin and destabilize the tear film.[65-66] In addition, DED and allergic conjunctivitis  
12 have certain similarities in signs and symptoms.[67-68] Therefore, we cannot rule out  
13 the possibility that some allergic conjunctivitis in this population may be misdiagnosed  
14 as dry eye, and the results should be interpreted cautiously.  
15  
16

17  
18 Asthma and DED are common clinical diseases, and there is still no evidence to support  
19 a causal relationship between asthma and DED, which may have a common  
20 pathophysiological mechanism even if they occur independently. Clinicians need to  
21 diagnose the possibility of both asthma and DED. Patients with asthma should  
22 strengthen the prevention and treatment of DED and try to avoid the risk factors of DED  
23 and iatrogenic DED, including the use of contact lenses and long-term use of visual  
24 display terminals, including refractive or cataract surgery.[69-70]  
25  
26

## 27 28 LIMITATIONS

29  
30 Our analysis included an in-depth and extensive literature search that included six  
31 studies, presented data of sufficient quality, and calculated outcome measures that were  
32 independent of the risk of research bias. However, our research has some limitations in  
33 the interpretation of the results. As a general defect in the meta-analysis of  
34 observational studies, we cannot rule out the possibility that certain residual factors may  
35 link asthma and DED, such as environmental factors and the use of asthma medications.  
36 Second, due to geographic and cultural differences, the lack of universal diagnostic  
37 criteria can affect the association between asthma and the incidence of DED. Finally,  
38 the results of this study do not indicate a causal relationship between asthma and DED.  
39 We recognize that this is a limitation; thus, the results should be interpreted cautiously.  
40  
41  
42  
43

## 44 45 CONCLUSIONS

46  
47 The results of our meta-analysis show that asthma patients have a higher risk of  
48 developing DED than those without asthma, and this relationship is significant in  
49 Australians, Caucasians, and Asians. However, this association may not reflect the  
50 cause and effect if unidentified confounders account for the results. These data suggest  
51 that patients with asthma may be at risk of developing a comorbid diagnosis of DED  
52 and should try to avoid risk factors and strengthen the prevention of DED.  
53  
54  
55  
56  
57  
58  
59  
60

1  
2  
3 **Author contributions** Huang Qun and Zheng yanlin planned and designed the study.  
4 Xiao Xili and Wang Jing conducted rigorous literature searches and data extraction.  
5 Wang Wanjie, Liao Tingting and Wang Juan conducted the data preparation, quality  
6 assessments, and data analyses. Huang Qun and Zhang Chuantao wrote and revised  
7 the manuscript. All the authors read and approved the final manuscript.  
8  
9

10 **Funding** This work was supported by Sichuan Science and technology program(grant  
11 number 2020JDRC0114), "Xinglin scholar" Research Promotion Project of Chengdu  
12 University of Traditional Chinese Medicine(grant number XSGG2019016 、  
13 XGZX2003、 JSZX005), "100 Talent Plan" Project of Hospital of Chengdu University  
14 of Traditional Chinese Medicine (grant number Hospital office [2020] 42), National  
15 training program for innovative backbone talents of traditional Chinese Medicine (grant  
16 number No. 91 [2019] of the State Office of Traditional Chinese Medicine), Science  
17 and technology development fund of Hospital of Chengdu University of traditional  
18 Chinese Medicine (grant number 19LW19、 18MZ12) . The funder has provided  
19 only financial support for the study.  
20  
21  
22  
23

24 **Competing interests** None declared.  
25

26 **Patient consent for publication** Not required.  
27

28 **Provenance and peer review** Not commissioned; externally peer reviewed.  
29

30 **Data sharing statement** All data relevant to the study are included in the article or  
31 uploaded as online supplemental information. Details of the characteristics of the  
32 included studies and data extracted are available from the corresponding author at  
33 zhengyanlin@cdutcm.edu.cn.  
34  
35  
36  
37  
38  
39  
40  
41  
42  
43  
44  
45  
46  
47  
48  
49  
50  
51  
52  
53  
54  
55  
56  
57  
58  
59  
60

only

## REFERENCES

---

1. Bradley, J.L., et al., *Dry eye disease ranking among common reasons for seeking eye care in a large US claims database*. Clin Ophthalmol, 2019. **13**: p. 225-232.
2. Dana, R., et al., *Estimated Prevalence and Incidence of Dry Eye Disease Based on Coding Analysis of a Large, All-age United States Health Care System*. Am J Ophthalmol, 2019. **202**: p. 47-54.
3. Yasir, Z.H., et al., *Prevalence and Determinants of Dry Eye Disease among 40 Years and Older Population of Riyadh (Except Capital), Saudi Arabia*. Middle East Afr J Ophthalmol, 2019. **26**(1): p. 27-32.
4. Tan, L.L., et al., *Prevalence of and risk factors for symptomatic dry eye disease in Singapore*. Clin Exp Optom, 2015. **98**(1): p. 45-53.
5. Song, P., et al., *Variations of dry eye disease prevalence by age, sex and geographic characteristics in China: a systematic review and meta-analysis*. J Glob Health, 2018. **8**(2): p. 020503.
6. Caffery, B., et al., *Prevalence of dry eye disease in Ontario, Canada: A population-based survey*. Ocul Surf, 2019. **17**(3): p. 526-531.
7. Titiyal, J.S., et al., *Prevalence and risk factors of dry eye disease in North India: Ocular surface disease index-based cross-sectional hospital study*. Indian J Ophthalmol, 2018. **66**(2): p. 207-211.
8. Stapleton, F., et al., *TFOS DEWS II Epidemiology Report*. Ocul Surf, 2017. **15**(3): p. 334-365.
9. Rapoport, Y., et al., *A Comprehensive Review of Sex Disparities in Symptoms, Pathophysiology, and Epidemiology of Dry Eye Syndrome*. Semin Ophthalmol, 2016. **31**(4):

- 1  
2  
3  
4 p. 325-36.  
5  
6  
7 10. Uchino, M., *What We Know About the Epidemiology of Dry Eye Disease in Japan*. Invest  
8  
9 Ophthalmol Vis Sci, 2018. **59**(14): p. 17-23491.  
10  
11  
12 11. McDonald, M., et al., *Economic and Humanistic Burden of Dry Eye Disease in Europe,*  
13  
14 *North America, and Asia: A Systematic Literature Review*. Ocul Surf, 2016. **14**(2): p. 144-  
15  
16 67.  
17  
18  
19 12. Craig, J.P., et al., *TFOS DEWS II Definition and Classification Report*. Ocul Surf, 2017.  
20  
21 **15**(3): p. 276-283.  
22  
23  
24 13. Kim, M., et al., *Dry eye disease and allergic conditions: A Korean nationwide population-*  
25  
26 *based study*. Am J Rhinol Allergy, 2016. **30**(6): p. 397-401.  
27  
28  
29 14. GINA Executive and Science committee. Global strategy for asthma management and  
30  
31 prevention. 2020. [https://ginasthma.org/wp-content/uploads/2020/06/GINA-2020-](https://ginasthma.org/wp-content/uploads/2020/06/GINA-2020-report_20_06_04-1-wms.pdf)  
32  
33 [report\\_20\\_06\\_04-1-wms.pdf](https://ginasthma.org/wp-content/uploads/2020/06/GINA-2020-report_20_06_04-1-wms.pdf) (accessed Feb 5, 2021).  
34  
35  
36  
37 15. To, T., et al., Global asthma prevalence in adults: findings from the cross-sectional world  
38  
39 health survey. BMC Public Health, 2012. **12**: p. 204.  
40  
41  
42 16. Ebmeier, S., et al., Trends in international asthma mortality: analysis of data from the WHO  
43  
44 Mortality Database from 46 countries (1993-2012). Lancet, 2017. **390**(10098): p. 935-945.  
45  
46  
47 17. Huang, K., et al., Prevalence, risk factors, and management of asthma in China: a national  
48  
49 cross-sectional study. Lancet, 2019. **394**(10196): p. 407-418.  
50  
51  
52  
53 18. Holt, P.G. and P.D. Sly, Viral infections and atopy in asthma pathogenesis: new rationales  
54  
55 for asthma prevention and treatment. Nat Med, 2012. **18**(5): p. 726-35.  
56  
57  
58  
59  
60

19. Busse, W.W., R.F. Lemanske, Jr., and J.E. Gern, Role of viral respiratory infections in asthma and asthma exacerbations. *Lancet*, 2010. **376**(9743): p. 826-34.
20. Sbihi, H., et al., Thinking bigger: How early-life environmental exposures shape the gut microbiome and influence the development of asthma and allergic disease. *Allergy*, 2019. **9**(10): p. 13812.
21. Leiria, L.O., M.A. Martins, and M.J. Saad, Obesity and asthma: beyond T(H)2 inflammation. *Metabolism*, 2015. **64**(2): p. 172-81.
22. Hedman, L., et al., Both environmental tobacco smoke and personal smoking is related to asthma and wheeze in teenagers. *Thorax*, 2011. **66**(1): p. 20-5.
23. Papi, A., et al., Asthma. *Lancet*, 2018. 391(10122): p. 783-800.
24. Enriquez-de-Salamanca, A., S. Bonini, and M. Calonge, Molecular and cellular biomarkers in dry eye disease and ocular allergy. *Curr Opin Allergy Clin Immunol*, 2012. **12**(5): p. 523-33.
25. Chen, L., et al., High incidence of dry eye in young children with allergic conjunctivitis in Southwest China. *Acta Ophthalmol*, 2016. **94**(8): p. e727-e730.
26. Villani, E., G. Rabbio, and P. Nucci, Ocular allergy as a risk factor for dry eye in adults and children. *Curr Opin Allergy Clin Immunol*, 2018. **18**(5): p. 398-403.
27. Heck, S., et al., High probability of comorbidities in bronchial asthma in Germany. *NPJ Prim Care Respir Med*, 2017. **27**(1): p. 017-0026.
28. Masuda, S., et al., High prevalence and young onset of allergic rhinitis in children with bronchial asthma. *Pediatr Allergy Immunol*, 2008. **19**(6): p. 517-22.
29. Huang, Y.C., et al., Association between dry eye disease and asthma: a nationwide



- 1  
2  
3  
4 population-based study. PeerJ, 2018. 5(6).  
5  
6  
7 30. Chia, E.M., et al., Prevalence and associations of dry eye syndrome in an older population:  
8  
9 the Blue Mountains Eye Study. Clin Exp Ophthalmol, 2003. **31**(3): p. 229-32.  
10  
11  
12 31. Moher, D., et al., Preferred reporting items for systematic reviews and meta-analyses: the  
13  
14 PRISMA statement. PLoS Med, 2009. **6**(7): p. 21.  
15  
16  
17 32. GA Wells, B.S., D O'Connell, J Peterson, V Welch, M Losos, et al. The Newcastle-Ottawa  
18  
19 Scale (NOS) for assessing the quality of nonrandomised studies in meta-analyses.  
20  
21 Available from: [http://www.ohri.ca/programs/clinical\\_epidemiology/oxford.asp](http://www.ohri.ca/programs/clinical_epidemiology/oxford.asp).  
22  
23  
24 33. Program, T.A. Agency for Healthcare Research and Quality. Available from:  
25  
26 <http://www.ahrq.gov/research/findings/ta/index.html>.  
27  
28  
29 34. Higgins, J.P., et al., Measuring inconsistency in meta-analyses. Bmj, 2003. **327**(7414): p.  
30  
31 557-60.  
32  
33  
34 35. Wang, T.J., et al., Comorbidities of dry eye disease: a nationwide population-based study.  
35  
36 Acta Ophthalmol, 2012. **90**(7): p. 663-8.  
37  
38  
39 36. Vehof, J., et al., Prevalence and risk factors of dry eye disease in a British female cohort.  
40  
41 Br J Ophthalmol, 2014. **98**(12): p. 1712-7.  
42  
43  
44 37. Alshamrani, A.A., et al., Prevalence and Risk Factors of Dry Eye Symptoms in a Saudi  
45  
46 Arabian Population. Middle East Afr J Ophthalmol, 2017. **24**(2): p. 67-73.  
47  
48  
49 38. Dogru, M., et al., Evaluation of the tear film instability in children with allergic diseases.  
50  
51 Cutan Ocul Toxicol, 2016. **35**(1): p. 49-52.  
52  
53  
54 39. Bielory, L., Ocular toxicity of systemic asthma and allergy treatments. Curr Allergy Asthma  
55  
56 Rep, 2006. **6**(4): p. 299-305.  
57  
58  
59  
60

- 1  
2  
3  
4 40. Paulsen, A. J., et al., Dry eye in the beaver dam offspring study: Prevalence, risk factors,  
5  
6 and health-related quality of life. *Am J Ophthalmol*, 2014. **157**: p.799–806.  
7  
8  
9 41. Wong, J., et al., Non-hormonal systemic medications and dry eye. *Ocul Surf*, 2011. **9**(4):  
10  
11 P. 212-226.  
12  
13  
14 42. Ousler, G. W., et al., An evaluation of the ocular drying effects of 2 systemic antihistamines:  
15  
16 Loratadine and cetirizine hydrochloride. *Ann Allergy Asthma Immunol*, 2004. **93**(5): P. 460-  
17  
18 464.  
19  
20  
21  
22 43. Galor, A., et al., Dry eye in the beaver dam offspring study: prevalence, risk factors, and  
23  
24 health-related quality of life. *Am J Ophthalmol*, 2011. **152**(3): p.377-384.e2.  
25  
26  
27 44. Paulsen, A. J., et al., 2014.Dry eye in the beaver dam offspring study: prevalence, risk  
28  
29 factors, and health-related quality of life. *Am J Ophthalmol*, 2014. **157**(4): p. 799-806.  
30  
31  
32 45. Bielory, L., Ocular toxicity of systemic asthma and allergy treatments. *Curr Allergy Asthma*  
33  
34 *Rep*, 2006. **6**(4): p. 299-305.  
35  
36  
37 46. Galor, A., et al., Environmental factors affect the risk of dry eye syndrome in a United  
38  
39 States veteran population. *Ophthalmology*, 2014. **121**(4): P. 972-973.  
40  
41  
42 47. Idarraga, M. A., et al., Relationships Between Short-Term Exposure to an Indoor  
43  
44 Environment and Dry Eye (DE) Symptoms. *J Clin Med*, 2020. **9**(5): P. 1316.  
45  
46  
47 48. Lukcso, D., et al., Indoor environmental and air quality characteristics, building-related  
48  
49 health symptoms, and worker productivity in a federal government building complex. *Arch*  
50  
51 *Environ Occup Health*, 2016. **71**(2): P. 85-101.  
52  
53  
54 49. Fanger P. O., Indoor air quality in the 21st century: search for excellence. *Indoor Air*, 2000.  
55  
56  
57  
58  
59  
60  
10(2): P. 68-73.

- 1  
2  
3  
4 50. Wolkoff P., Ocular discomfort by environmental and personal risk factors altering the  
5  
6 precorneal tear film. *Toxicol Lett*, 2010. 199(3): P. 203-212.  
7  
8  
9 51. Mo, Z., et al., Impacts of air pollution on dry eye disease among residents in Hangzhou,  
10  
11 China: A case-crossover study. *Environ Pollut*, 2019. 246: P. 183-189.  
12  
13  
14 52. Novaes, P., et al., The effects of chronic exposure to traffic derived air pollution on the  
15  
16 ocular surface. *Environ Res*, 2010. 110(4): P. 372-374.  
17  
18  
19 53. Kim, Y., et al., Short-Term Effects of Ground-Level Ozone in Patients With Dry Eye  
20  
21 Disease: A Prospective Clinical Study. *Cornea*, 2019. 38(12): P. 1483-1488.  
22  
23  
24 54. Yang, Q., et al., Effects of fine particulate matter on the ocular surface: An in vitro and in  
25  
26 vivo study. *Biomed Pharmacother*, 2019. 117: P. 109177.  
27  
28  
29 55. Tan, G., et al., Air pollutant particulate matter 2.5 induces dry eye syndrome in mice. *Sci*  
30  
31 *Rep*, 2018. 8(1): P. 17828.  
32  
33  
34 56. Wolkoff P., Indoor air humidity, air quality, and health - An overview. *Int J Hyg Environ*  
35  
36 *Health*, 2018. 221(3): P. 376-390.  
37  
38  
39 57. Wolkoff, P., The dichotomy of relative humidity on indoor air quality. *Environ Int*, 2007.  
40  
41 33(6): P. 850-857.  
42  
43  
44 58. Gibson, P.G. and V.M. McDonald, Management of severe asthma: targeting the airways,  
45  
46 comorbidities and risk factors. *Intern Med J*, 2017. 47(6): p. 623-631.  
47  
48  
49 59. Guida, G. and A.M. Riccio, Immune induction of airway remodeling. *Semin Immunol*, 2019.  
50  
51 14(101346): p. 101346.  
52  
53  
54 60. Barabino, S., et al., Ocular surface immunity: homeostatic mechanisms and their disruption  
55  
56 in dry eye disease. *Prog Retin Eye Res*, 2012. 31(3): p. 271-85.  
57  
58  
59  
60

- 1  
2  
3  
4 61. Wei, Y. and P.A. Asbell, The core mechanism of dry eye disease is inflammation. *Eye*  
5  
6  
7 Contact Lens, 2014. 40(4): p. 248-56.  
8  
9 62. Yamaguchi, T., Inflammatory Response in Dry Eye. *Invest Ophthalmol Vis Sci*, 2018.  
10  
11 59(14): p. 17-23651.  
12  
13  
14 63. Reyes, J.L., et al., Innate and Adaptive Cell Populations Driving Inflammation in Dry Eye  
15  
16 Disease. *Mediators Inflamm*, 2018. 12(2532314).  
17  
18  
19 64. Neto, H. J., et al., Allergic conjunctivitis in asthmatic children: as common as underreported.  
20  
21  
22 *Ann Allergy Asthma Immunol*, 2010. 105: p. 399-400.  
23  
24  
25 65. Onguchi, T., et al., The impact of the onset time of atopic keratoconjunctivitis on the tear  
26  
27 function and ocular surface findings. *Am J Ophthalmol*, 2006. 141: p. 569-571.  
28  
29  
30 66. Hu, Y., et al., The differences of tear function and ocular surface findings in patients with  
31  
32 atopic keratoconjunctivitis and vernal keratoconjunctivitis. *Allergy*, 2007. 62: p. 917-925.  
33  
34  
35 67. Baudouin, C., Formes frontières de l'allergie [Conditions bordering on allergy]. *J Fr*  
36  
37 *Ophthalmol*, 2007. 30: p.306-313.  
38  
39  
40 68. Hom, M. M., et al., Allergic conjunctivitis and dry eye syndrome. *Ann Allergy Asthma*  
41  
42 *Immunol*, 2012.108: p.163-166.  
43  
44  
45 69. Uchino, M., et al., Prevalence and risk factors of dry eye disease in Japan: Koumi study.  
46  
47  
48 *Ophthalmology*, 2011. 118(12): p. 2361-7.  
49  
50  
51 70. Gomes, J.A.P., et al., TFOS DEWS II iatrogenic report. *Ocul Surf*, 2017. 15(3): p. 511-538.  
52  
53  
54  
55  
56  
57  
58  
59  
60

## Figure Legends

---

Figure 1. Flow chart of literature search.

Figure 2. Meta-analysis of asthma and DED using a random-effects model.

Figure 3. Subgroup analysis by ethnicity of asthma and DED.

Figure 4. Funnel plot of a meta-analysis of asthma and DED.

For peer review only

1  
2  
3  
4  
5  
6  
7  
8  
9  
10  
11  
12  
13  
14  
15  
16  
17  
18  
19  
20  
21  
22  
23  
24  
25  
26  
27  
28  
29  
30  
31  
32  
33  
34  
35  
36  
37  
38  
39  
40  
41  
42  
43  
44  
45  
46  
47  
48  
49  
50  
51  
52  
53  
54  
55  
56  
57  
58  
59  
60

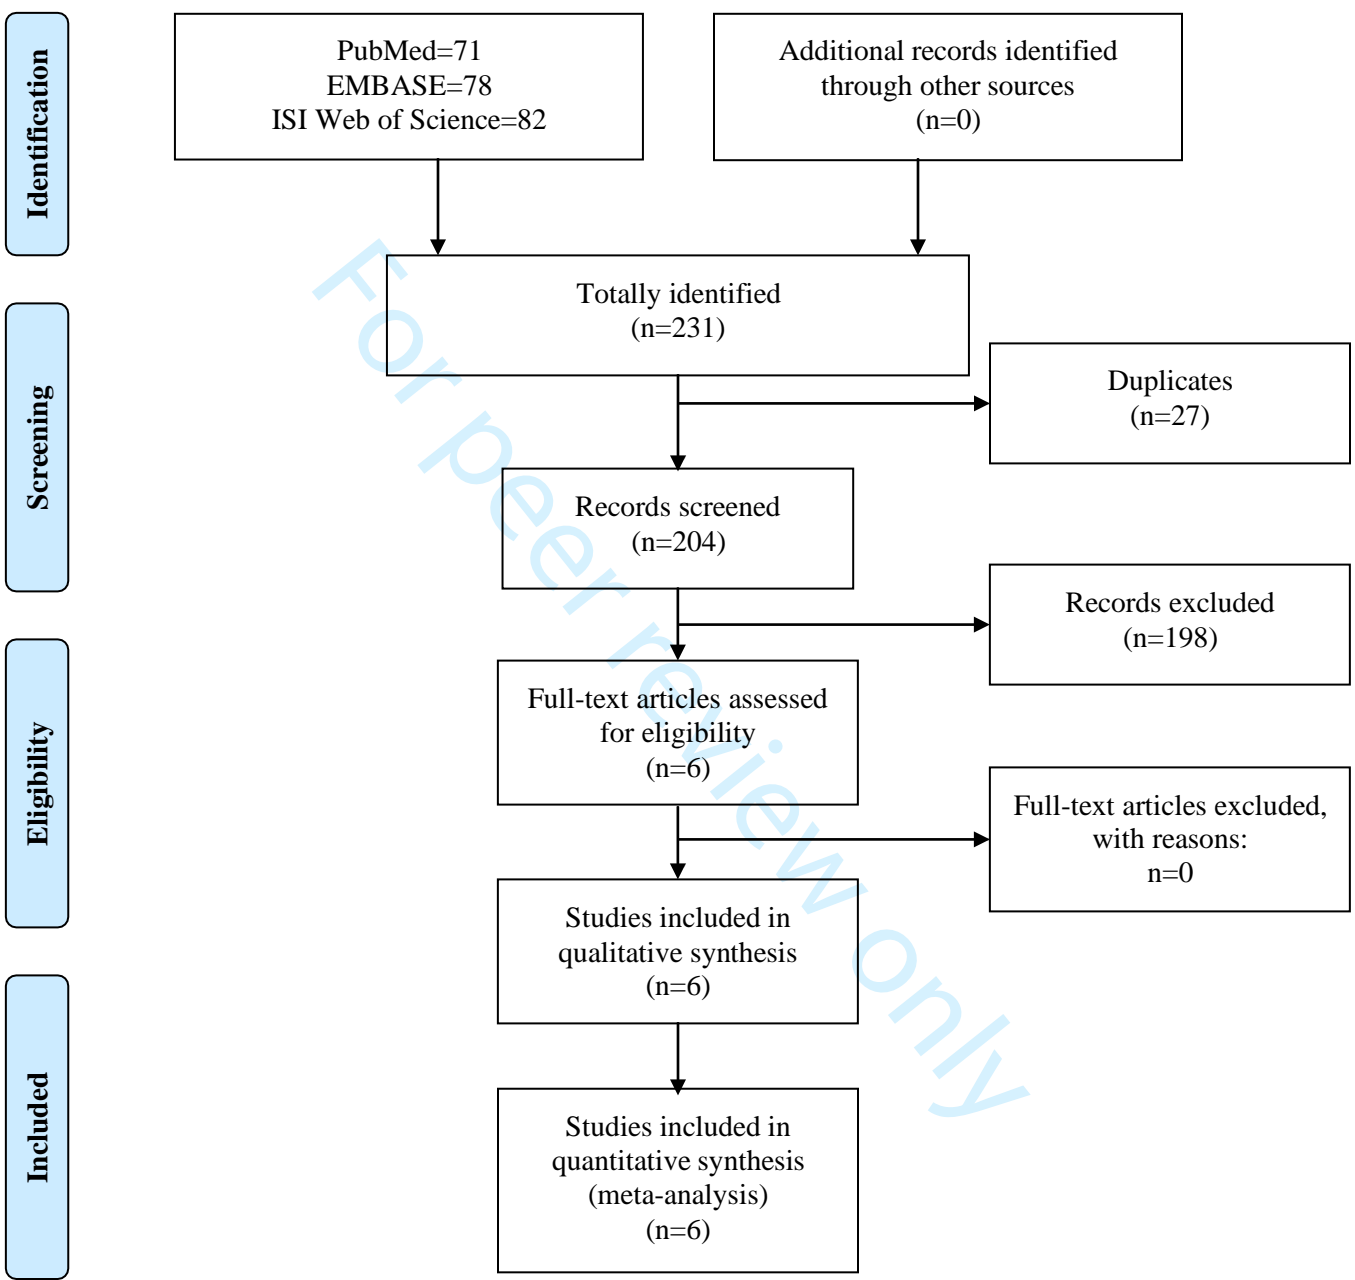

1  
2  
3  
4  
5  
6  
7  
8  
9  
10  
11  
12  
13  
14  
15  
16  
17  
18  
19  
20  
21  
22  
23  
24  
25  
26  
27  
28  
29  
30  
31  
32  
33  
34  
35  
36  
37  
38  
39  
40  
41  
42  
43  
44  
45  
46  
47  
48  
49  
50  
51  
52  
53  
54  
55  
56  
57  
58  
59  
60

For peer review only



only

1  
2  
3  
4  
5  
6  
7  
8  
9  
10  
11  
12  
13  
14  
15  
16  
17  
18  
19  
20  
21  
22  
23  
24  
25  
26  
27  
28  
29  
30  
31  
32  
33  
34  
35  
36  
37  
38  
39  
40  
41  
42  
43  
44  
45  
46  
47  
48  
49  
50  
51  
52  
53  
54  
55  
56  
57  
58  
59  
60





1  
2  
3  
4  
5  
6  
7  
8  
9  
10  
11  
12  
13  
14  
15  
16  
17  
18  
19  
20  
21  
22  
23  
24  
25  
26  
27  
28  
29  
30  
31  
32  
33  
34  
35  
36  
37  
38  
39  
40  
41  
42  
43  
44  
45  
46  
47  
48  
49  
50  
51  
52  
53  
54  
55  
56  
57  
58  
59  
60

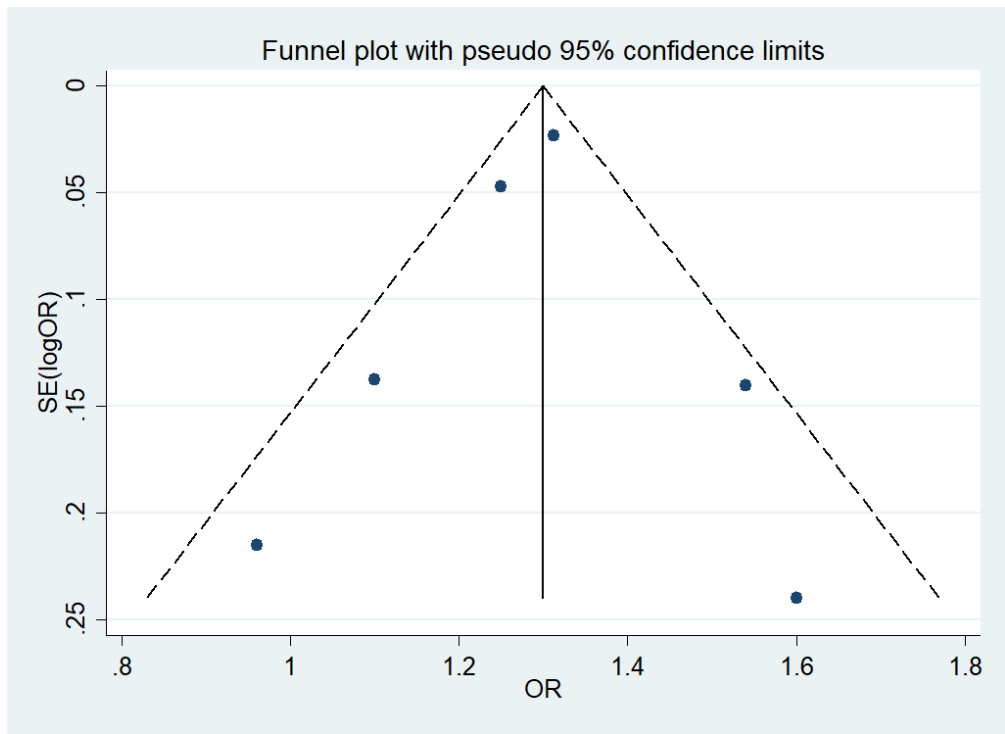

Funnel plot of a meta-analysis of asthma and DED

360x261mm (72 x 72 DPI)
